# Supplementary material for: Programming DNA origami patterning with non-canonical DNA-based metallization reactions
Source: PubMed Central journal article supplement (PMC6897912; doi:10.1038/s41467-019-13507-5), 2019-12-06
Supplement: 41467_2019_13507_MOESM1_ESM.pdf [file 41467_2019_13507_MOESM1_ESM.pdf]

Supplementary Information for

## **Programming DNA origami patterning with non-canonical DNA-based metallization reactions**

Sisi Jia<sup>1,2†</sup>, Jianbang Wang<sup>2†</sup>, Mo Xie<sup>2</sup>, Jixue Sun<sup>3</sup>, Huajie Liu<sup>4\*</sup>, Yinan Zhang<sup>2</sup>, Jie Chao<sup>5</sup>, Jiang Li<sup>2,6</sup>, Lihua Wang<sup>2,7</sup>, Jianping Lin<sup>3</sup>, Kurt V. Gothelf<sup>8</sup>, Chunhai Fan<sup>1\*</sup>

<sup>1</sup>School of Chemistry and Chemical Engineering, and Institute of Molecular Medicine, Renji Hospital, School of Medicine, Shanghai Jiao Tong University, Shanghai 200240, China

<sup>2</sup>Division of Physical Biology, CAS Key Laboratory of Interfacial Physics and Technology, Shanghai Synchrotron Radiation Facility, Shanghai Institute of Applied Physics, Chinese Academy of Sciences, Shanghai 201800, China.

<sup>3</sup>State Key Laboratory of Medicinal Chemical Biology and College of Pharmacy, Nankai University, Tianjin 300071, China.

<sup>4</sup>School of Chemical Science and Engineering, Key Laboratory of Advanced Civil Engineering Materials of Ministry of Education, Tongji University, Shanghai 200092, China

<sup>5</sup>Key Laboratory for Organic Electronics & Information Displays (KLOEID), Institute of Advanced Materials (IAM) and School of Materials Science and Engineering, Nanjing University of Posts & Telecommunications, Nanjing 210046, China.

<sup>6</sup>Zhangjiang Laboratory, Shanghai Advanced Research Institute, Chinese Academy of Sciences, Shanghai 201210, China

<sup>7</sup>Shanghai Key Laboratory of Green Chemistry and Chemical Processes, School of Chemistry and Molecular Engineering, East China Normal University, 500 Dongchuan Road, Shanghai, 200241, China

<sup>8</sup>Center for DNA Nanotechnology (CDNA) at the Interdisciplinary Nanoscience Center (iNANO) and the Department of Chemistry, Aarhus University, Aarhus 8000, Denmark.

†These authors contributed equally to this work.

\*e-mail: liuhuajie@tongji.edu.cn; fanchunhai@sjtu.edu.cn

This file includes:

Supplementary Figures 1 to 33

Supplementary Notes: DNA sequences

Supplementary References

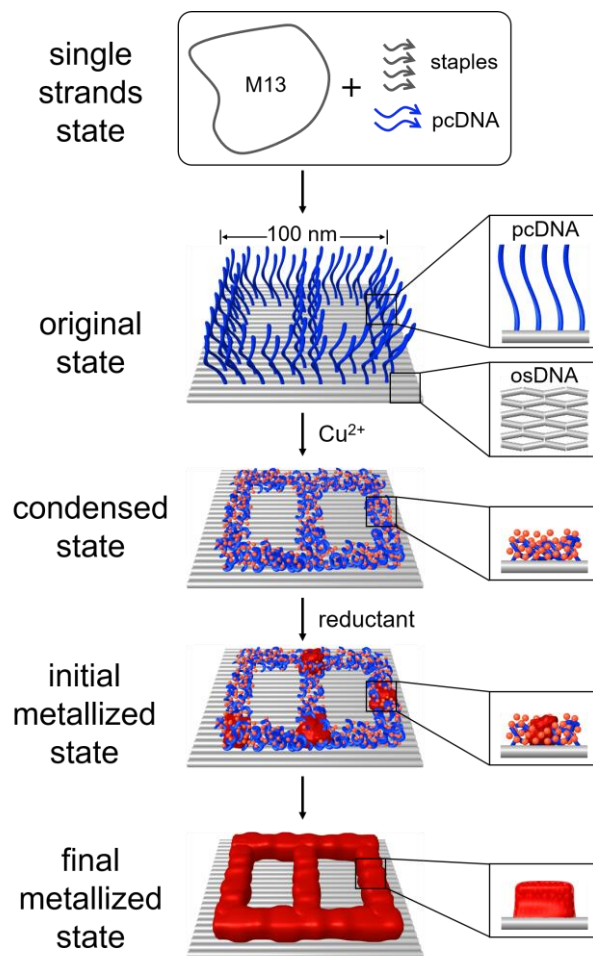

**Supplementary Figure 1. Schematic illustration of Cu plating on DNA origami to form the *digit 8*.**

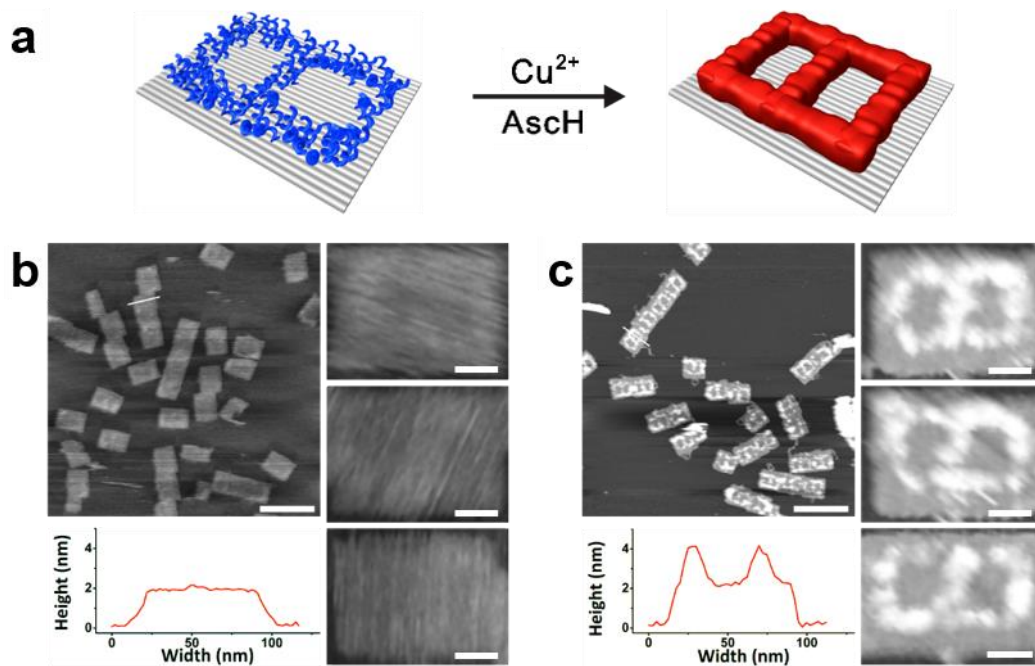

**Supplementary Figure 2. Cu plating on DNA origami of *digit 8*.** **a**, Schematic illustration of the formation of *digit 8* on DNA origami. **b**, AFM image showing the DNA template. **c**, AFM image showing the metal nanocircuit of *digit 8* pattern on DNA origami. Scale bars: 200 nm (large area images) and 25 nm (higher magnification images).

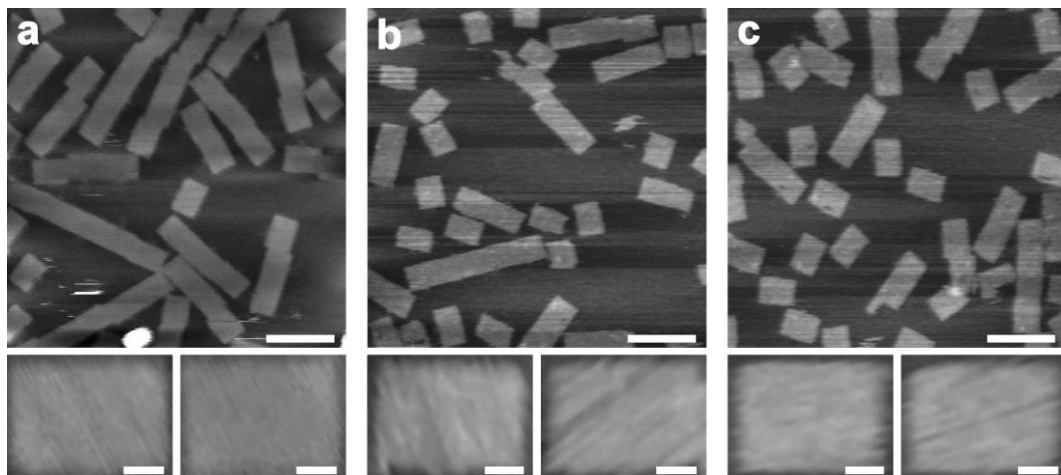

**Supplementary Figure 3. Control AFM measurements of Cu plating on DNA origami.** **a**, AFM image of copper plating reaction on a flat origami with only osDNA. **b**, AFM image showing no metallization on pcDNA without AscH. **c**, AFM image showing no metallization on pcDNA without  $\text{CuCl}_2$ . Scale bars: 200 nm (large area images) and 25 nm (higher magnification images).

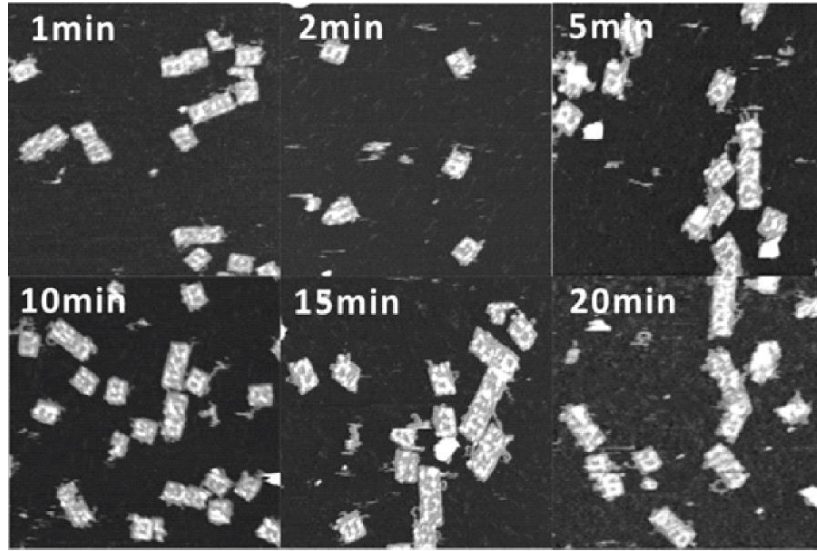

**Supplementary Figure 4. Effect of reaction time on Cu metallization on DNA origami.** The AFM images showed the copper plating on DNA origami of a *digit 8* pattern. Scale bar: 200 nm.

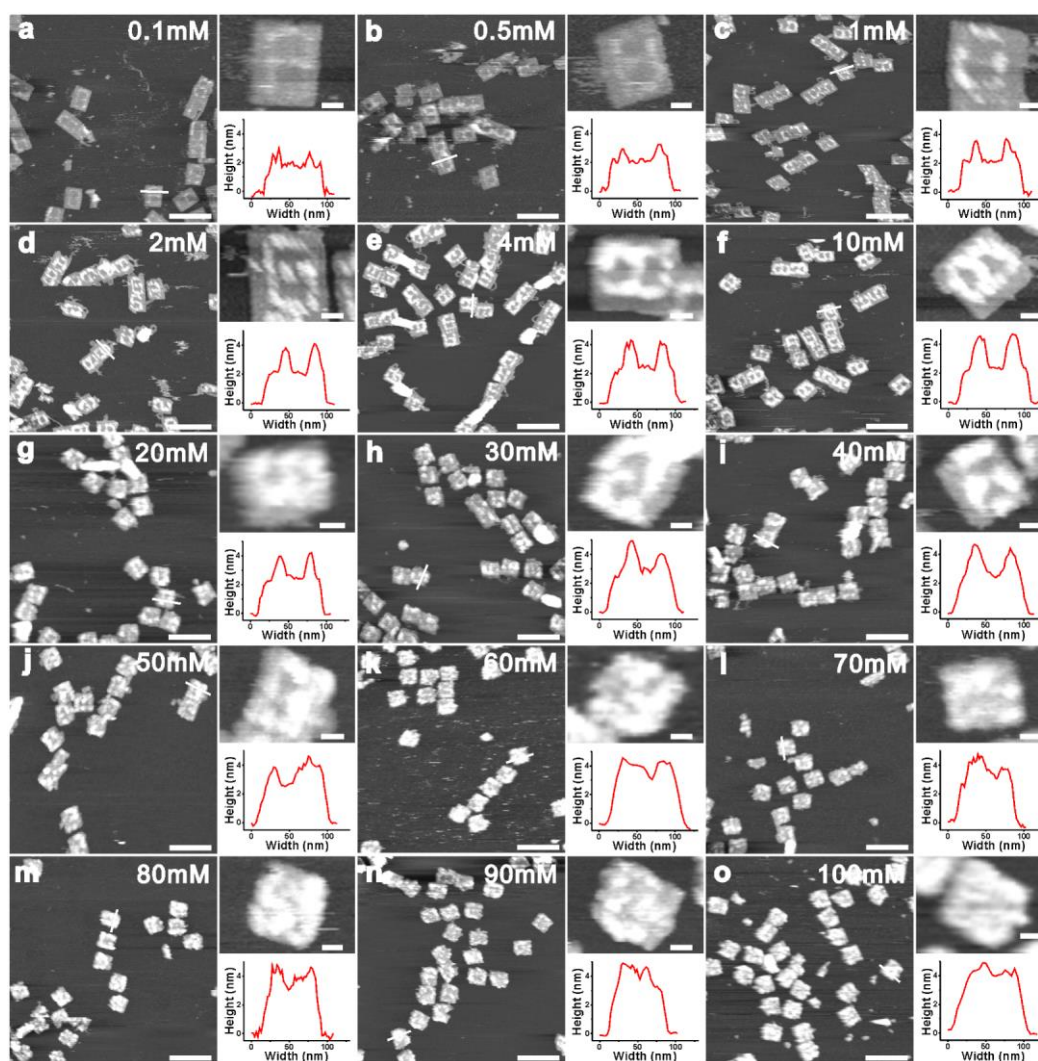

**Supplementary Figure 5. Effect of  $\text{Cu}^{2+}$  concentration on Cu metallization.** The concentrations for a-c were 0.1, 0.5 and 1 mM respectively. For d-f, the concentrations were 2, 4 and 10 mM respectively. The concentrations for g-o were 20, 30, 40, 50, 60, 70, 80, 90 and 100 mM respectively. Scale bars: 200 nm (large area images) and 25 nm (higher magnification images).

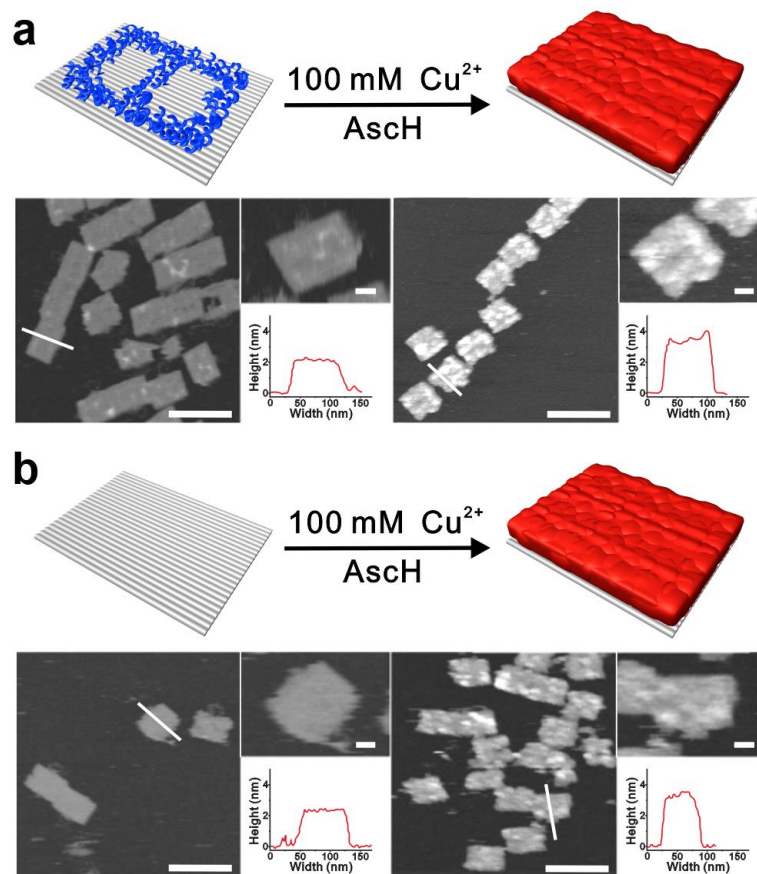

**Supplementary Figure 6. Cu metallization with a high concentration of Cu<sup>2+</sup> (100 mM).** **a**, Copper metallization on a DNA origami of *digit 8* pattern. **b**, Metallization on a flat DNA origami without any pcDNA. Scale bars: 200 nm (large area images) and 25 nm (higher magnification images).

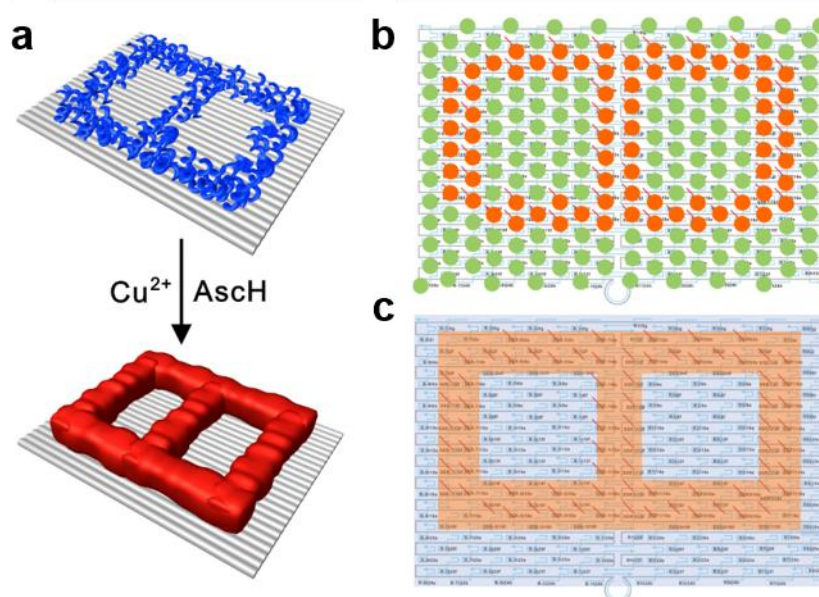

**Supplementary Figure 7. Calculation of the theoretical proportion of the metalized area.** **a**, Schematic illustration of the metallization on the *digit 8* pattern. **b**, Illustration of the calculation method 1: the total number of staples is 216 and the number of pcDNA is 75, therefore the proportion is  $75/216 = 34.72\%$ . **c**, Illustration of the calculation method 2: the size of this origami is  $7000 \text{ nm}^2$  and the size of the metalized area is  $2813 \text{ nm}^2$ , therefore the proportion is  $2813/7000 = 40.19\%$ .



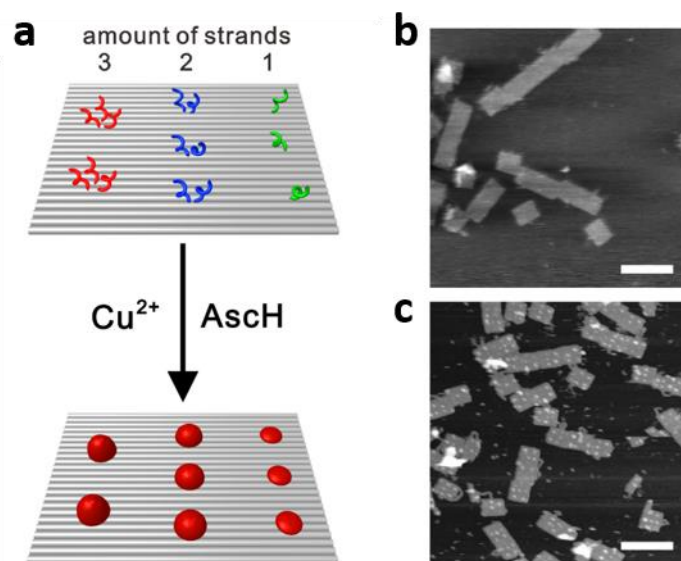

**Supplementary Figure 8. Number effects of pcDNA strands per site on metallization.** **a**, Schematic representation of the origami canvas with seven predefined sites containing one, two and three pcDNA strands, respectively. Each single strand contained 15 bases. **b-c**, AFM measurements for before (**b**) and after (**c**) Cu metallization. Scale bars: 200 nm.

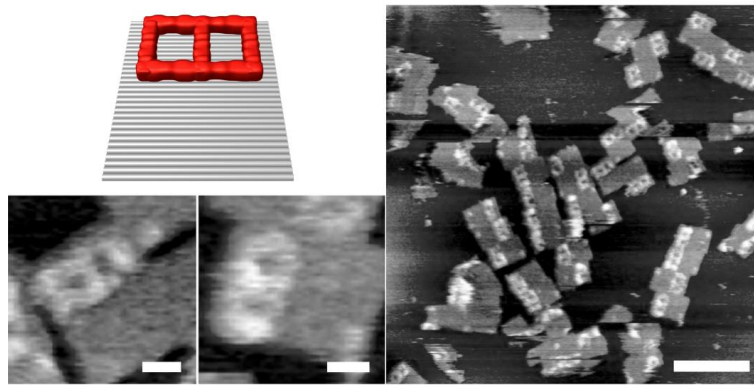

**Supplementary Figure 9.** Cu metallization on *miniaturized digit 8* pattern. Scale bars: 200 nm (large area image) and 25 nm (higher magnification images).

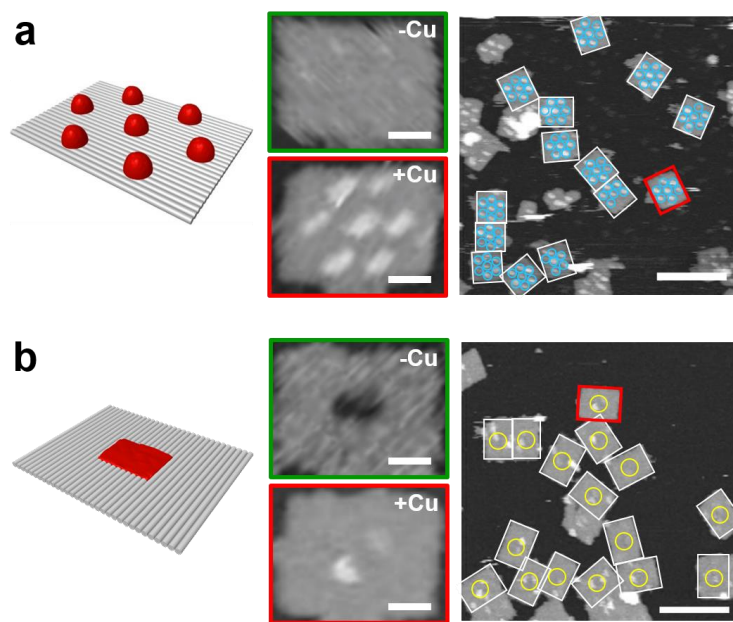

**Supplementary Figure 10. Cu plating on a *seven-dot* pattern in a positive mode (a) and Cu plating on a *rectangular block* pattern in a negative mode (b). Scale bars: 200 nm (large area images) and 25 nm (higher magnification images).**

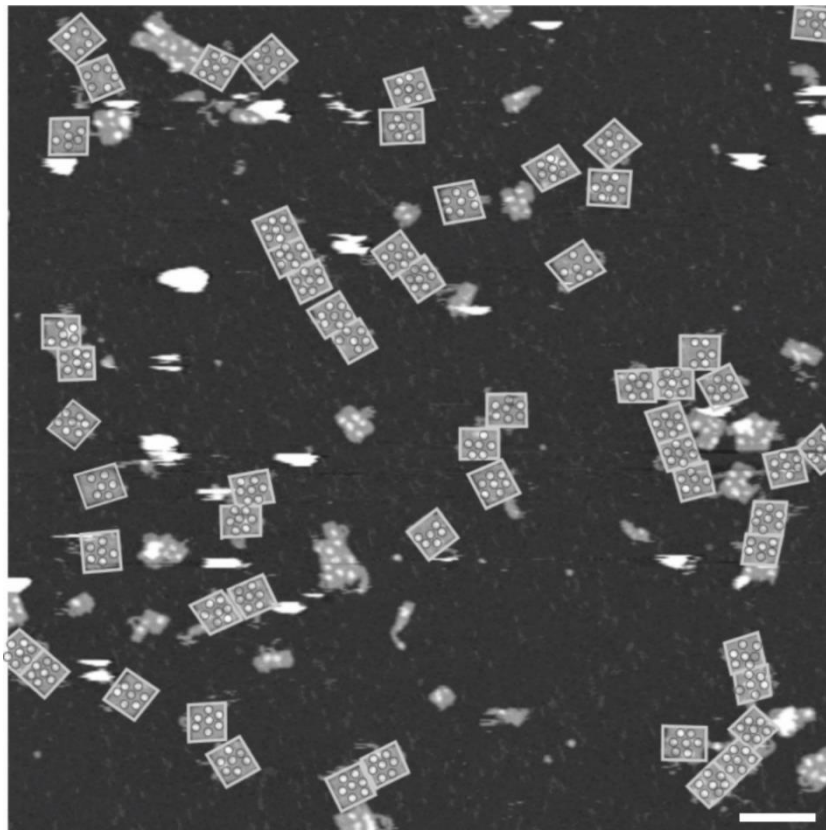

| Counted origami | Theoretical number of dots | Found number of dots | Yield of Cu metallization |
|-----------------|----------------------------|----------------------|---------------------------|
| 57              | 399                        | 383                  | 95.99%                    |

**Supplementary Figure 11. Counting metallization yield on *seven-dot* pattern. The rectangle panes and circles highlighted the DNA origami contours and the metallized dots after Cu plating process. Scale bar: 200 nm.**

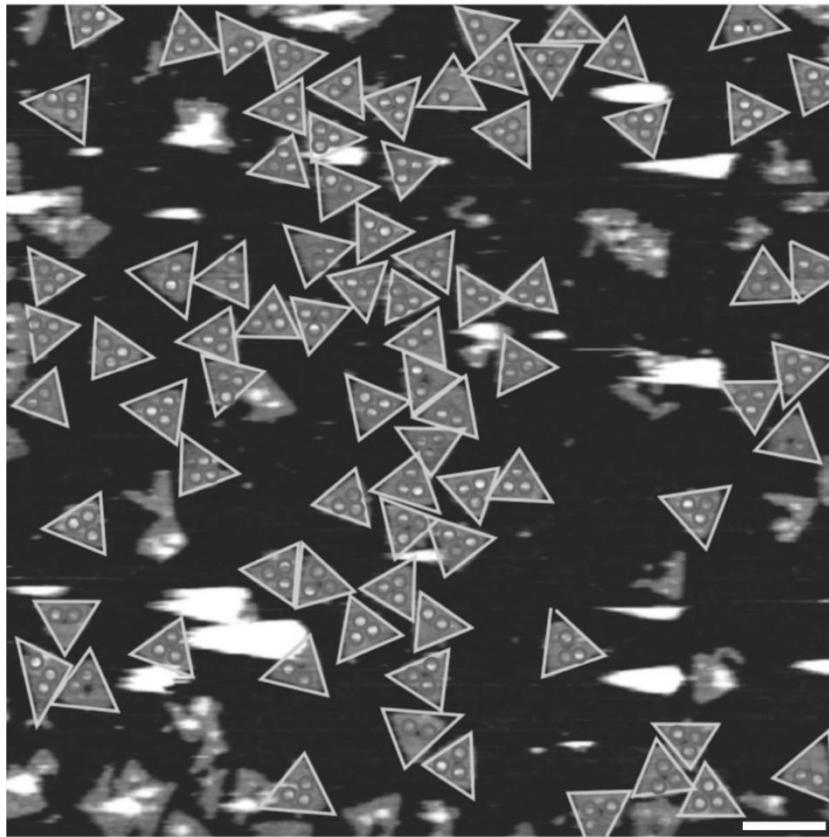

| Counted origami | Theoretical number of dots | Found number of dots | Yield of Cu metallization |
|-----------------|----------------------------|----------------------|---------------------------|
| 81              | 243                        | 219                  | 90.12%                    |

**Supplementary Figure 12. Counted yield of Cu metallization on *three-dot* pattern. The triangle panes and circles highlighted the DNA origami contours and the metallized dots after Cu plating process. Scale bar: 200 nm.**

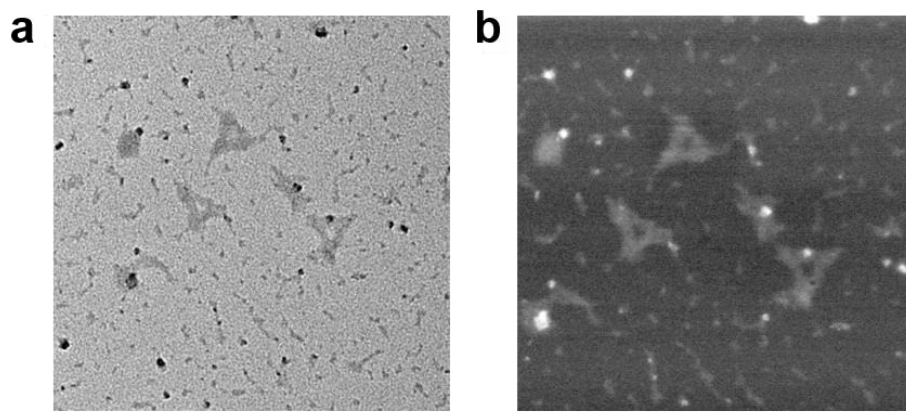

**Supplementary Figure 13. TEM measurement of Cu metallization on triangular origami. a, TEM image. b, STEM image. Scale bars: 100 nm.**

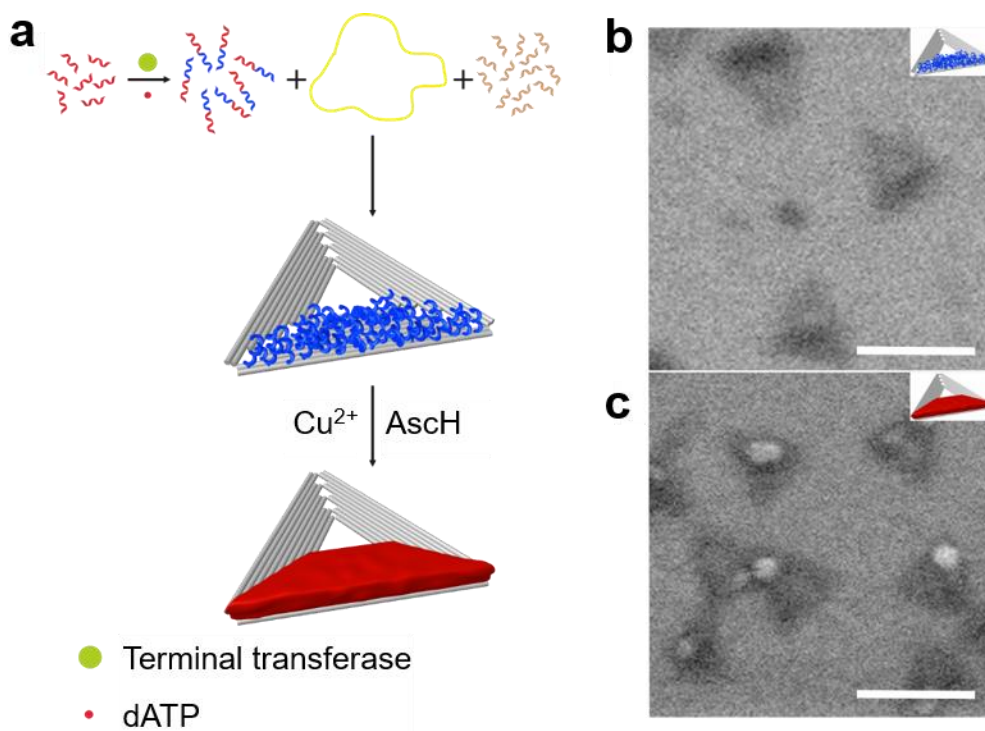

**Supplementary Figure 14. SEM measurement of Cu metallization on triangular origami.** **a**, Schematic illustration of the prolonging of staple strands and the plating process on DNA origami. **b-c**, SEM images showing the DNA origami and the metallization before and after plating. Scale bars: 200 nm.

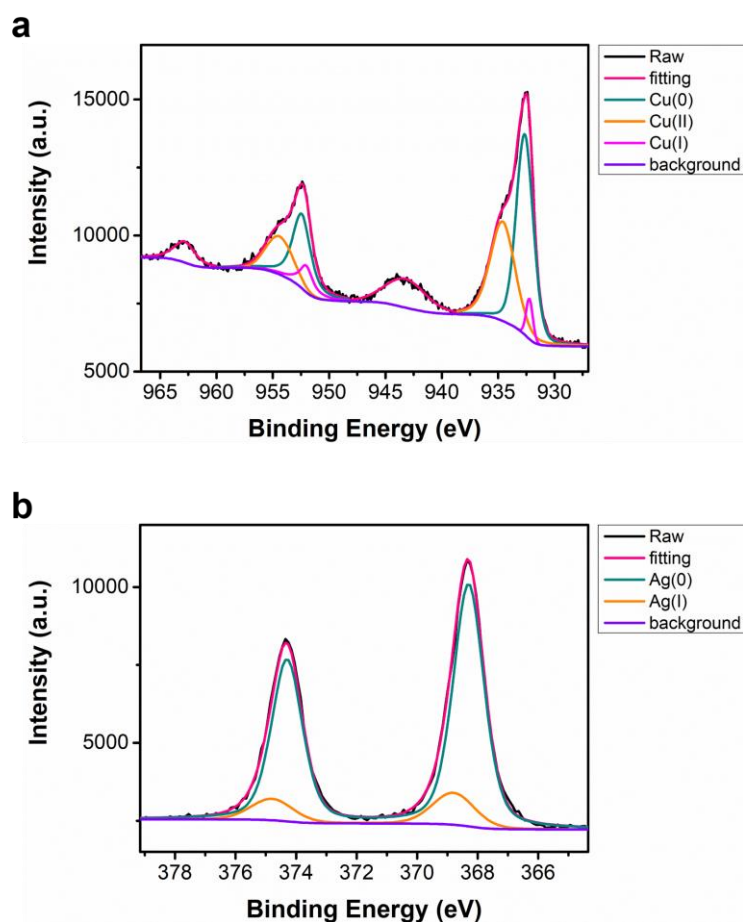

**Supplementary Figure 15. X-ray Photoelectron spectra of the Cu and Ag metallization samples.** **a**, XPS spectrum of Cu $2p$  region (raw data, black curve) and the fitting model (pink curve) showing that the sample included three components: Cu(0) (dark cyan curve, 55.2%), Cu(II) (orange curve, 40.9%) and Cu(I) (magenta curve, 4.0%) species<sup>1</sup>. **b**, XPS spectrum of Ag $3d$  region (raw data, black curve) and the fitting model (pink curve) showing that the sample included two components: Ag(0) (dark cyan curve, 86.0%) and Ag(I) (orange curve, 14.0%) species<sup>2</sup>.



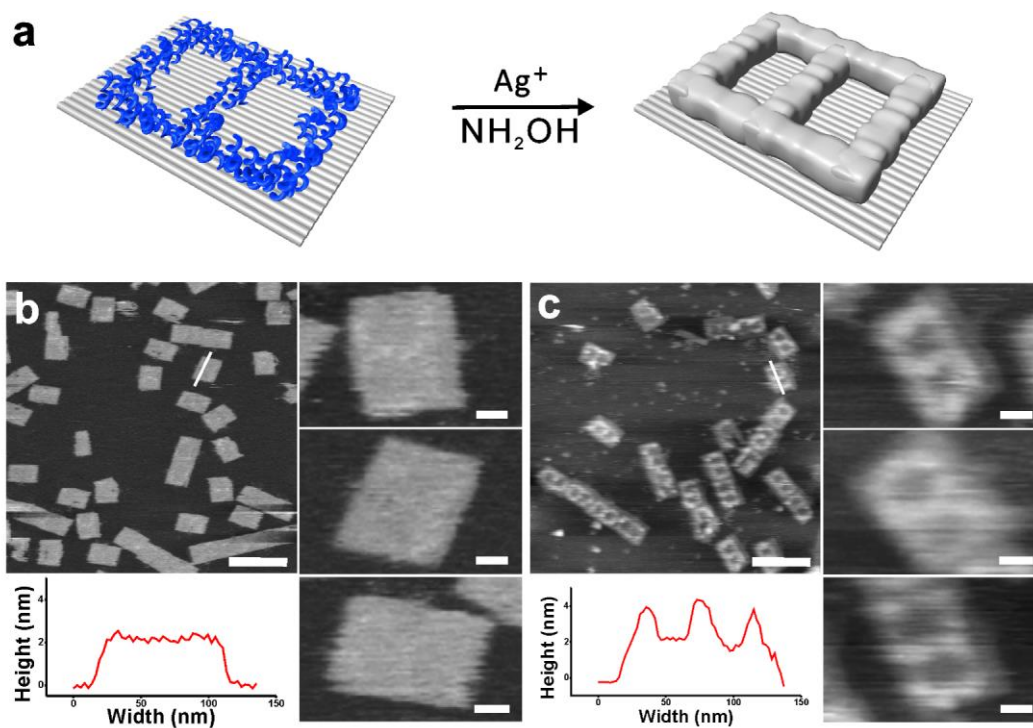

**Supplementary Figure 16. Ag metallization on DNA origami of *digit 8* pattern.** **a**, Schematic representation of the Ag metallization process. The mica-attached DNA origami of *digit 8* pattern was treated with the plating solution of  $\text{AgNO}_3$  and  $\text{NH}_2\text{OH}$ . **b-c**, AFM images and cross-section analysis measured before (**b**) and after (**c**) Ag metallization. Scale bars: 200 nm (large area images) and 25 nm (higher magnification images).

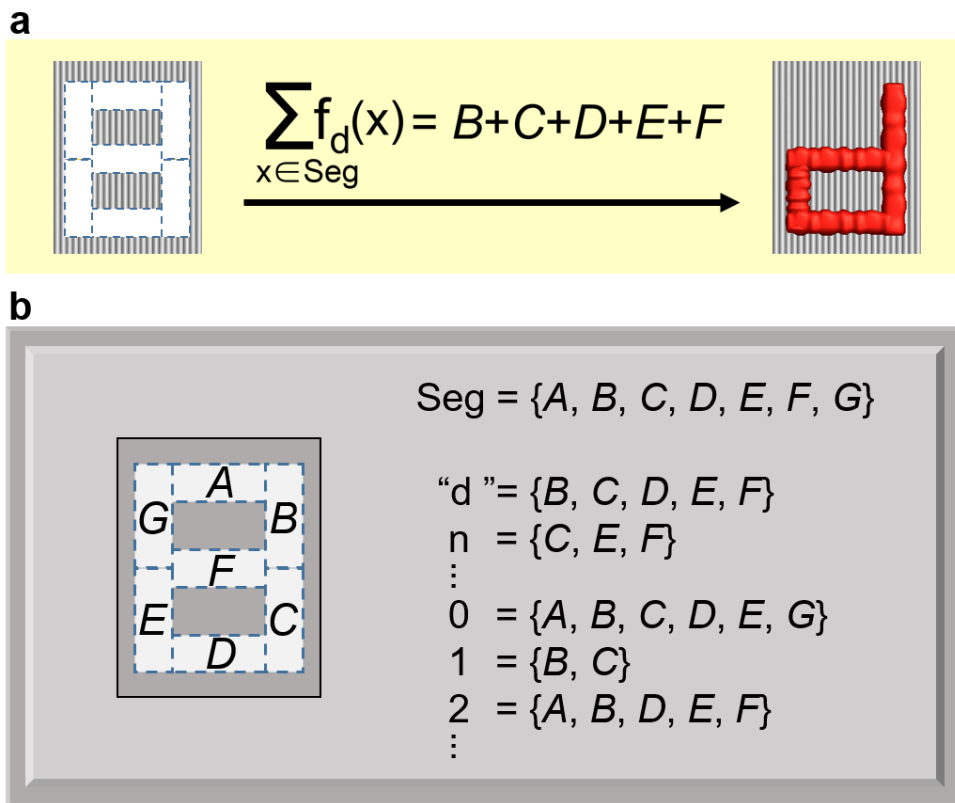

**Supplementary Figure 17. Fabricating nano-PCB mimics with DCIMP.** **a**, A *seven-segment digit 8* design was employed to fabricate nano-PCB mimics on a rectangular origami. To design an *alphabet d* pattern, we placed pcDNA on selected segments *B, C, D, E* and *F* ( $d = [B, C, D, E, F] \subset \text{Seg} = [A, B, C, D, E, F, G]$ ). **b**, To show the generality, we fabricated digits from 0 to 9 and several typical alphabets, as shown in corresponding AFM images.

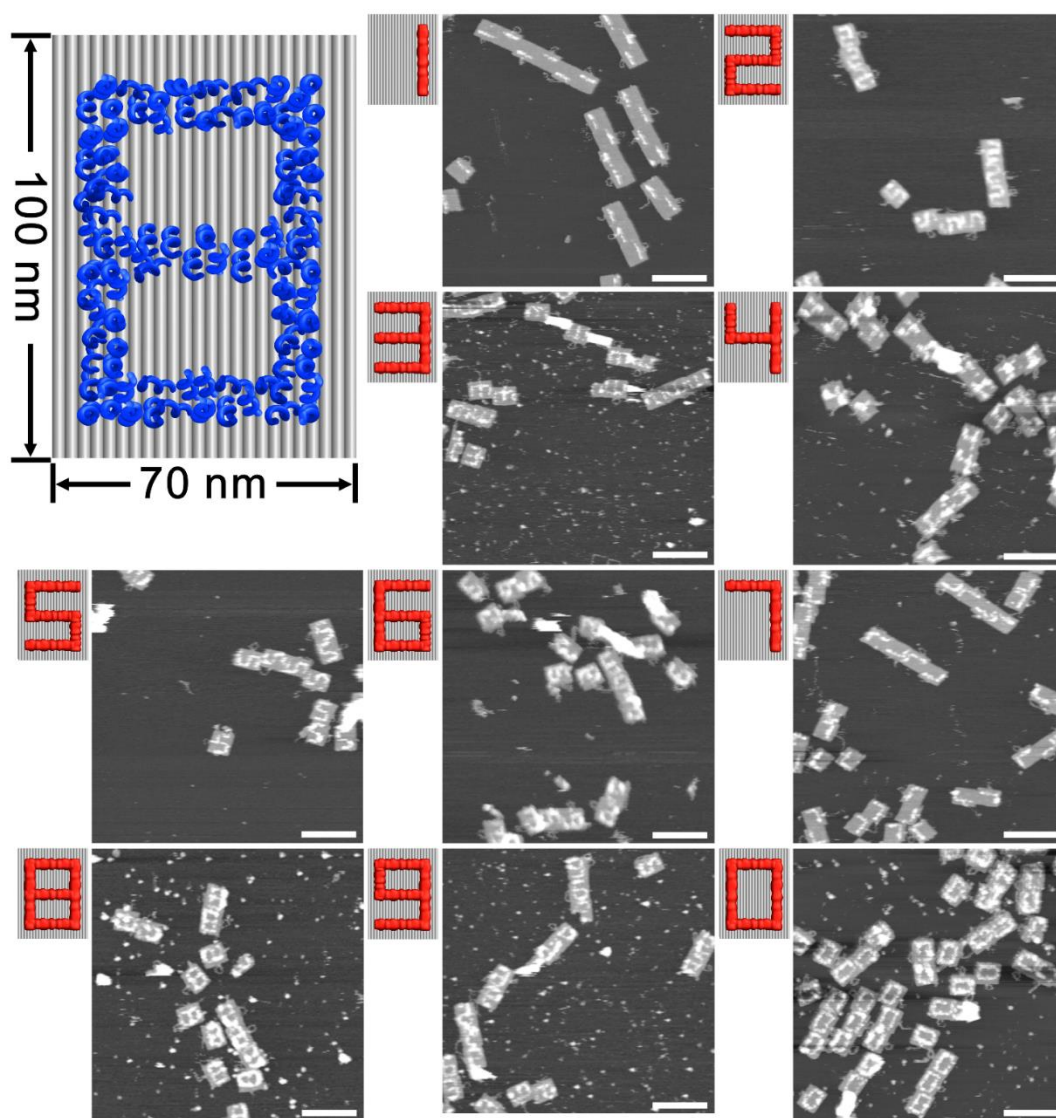

Supplementary Figure 18. Cu metallization of numerals based on nanosized *seven-segment display* pattern. AFM images showed metallized numerals from 0 to 9. Scale bars: 200 nm.

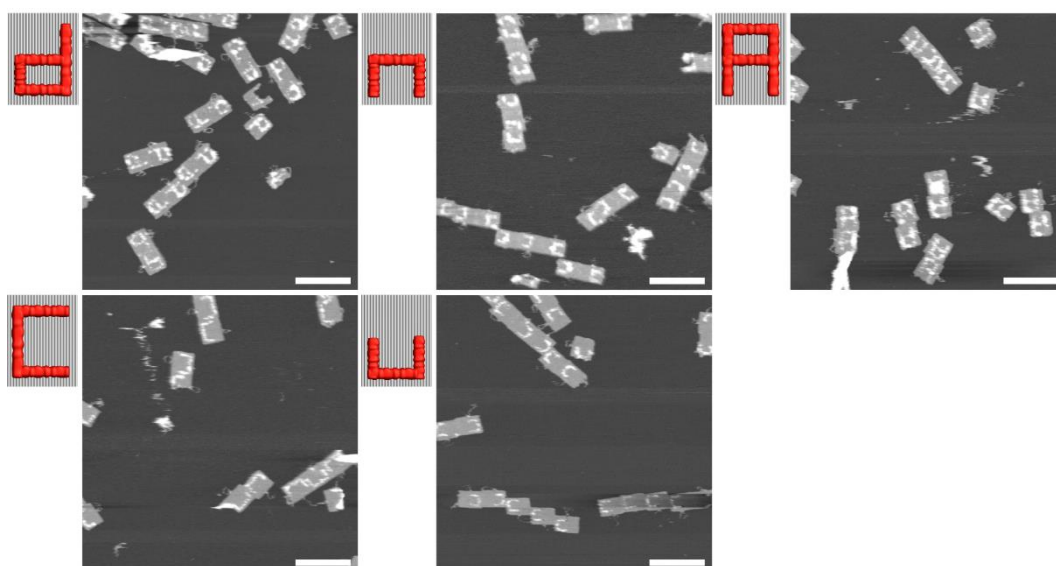

**Supplementary Figure 19. Cu metallization of alphabets based on nanosized *seven-segment display* pattern. AFM images showed metalized alphabets *d*, *n*, *A* and *C*, *u*. Scale bars: 200 nm.**

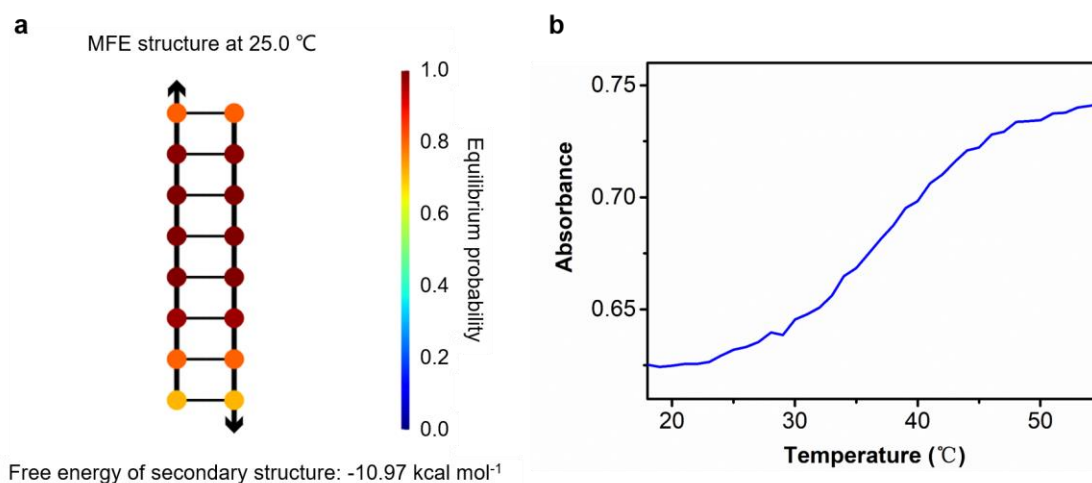

**Supplementary Figure 20. Thermodynamic simulation and UV absorbance at 260 nm measurement of the short DNA sequences.** **a**, Thermodynamic simulation of the sequences using NUPACK software with 0.05 M Na<sup>+</sup>, 0.012 M Mg<sup>2+</sup> at 25 °C. The  $\Delta G$  of the double strands of the 8-base sequences was -10.97 kcal mol<sup>-1</sup>. **b**, UV absorbance measurement at 260 nm of the sequences. For clear UV absorbance curve, the concentration of the strands was set at 6  $\mu$ M in 1  $\times$  TA-Mg<sup>2+</sup> (pH 8.0) buffer. The rate of increasing temperature was set at 1 °C min<sup>-1</sup>. T<sub>m</sub> of the sequences was 37.3 °C according the UV absorbance curve<sup>3</sup>.

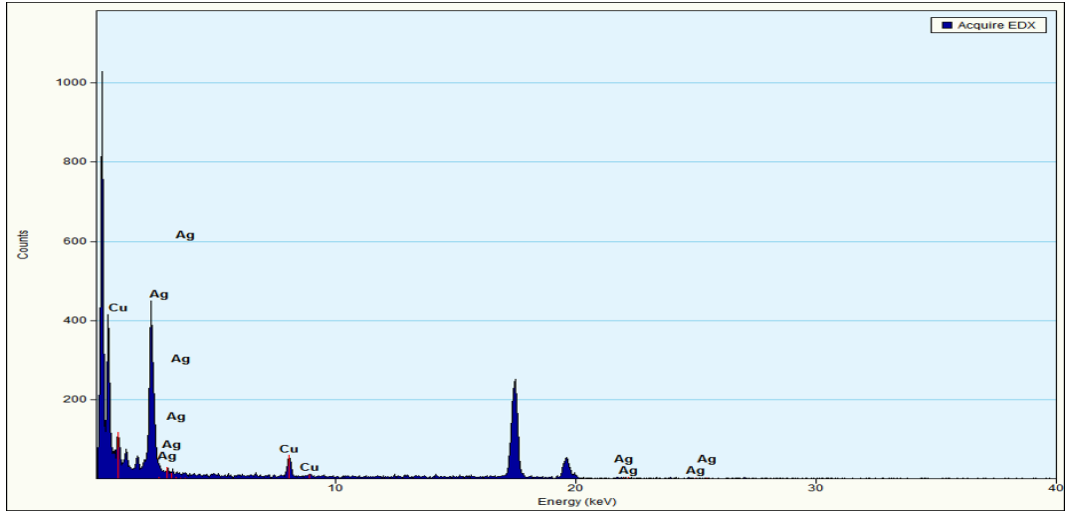

**Supplementary Figure 21. EDX measurement of the metallized pattern with Ag and Cu. The elemental peaks of Cu and Ag showed that both of them were presented.**



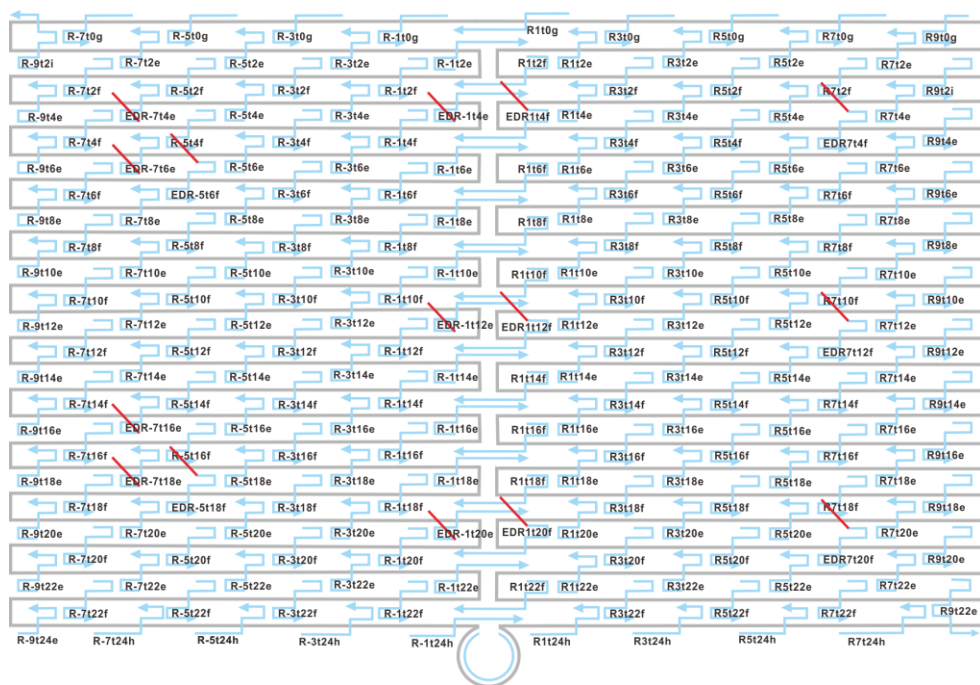

**Supplementary Figure 23. Schematic representation of *eight-dot* pattern on rectangular DNA origami with varied amount of protruding ssDNA strands at each site.**



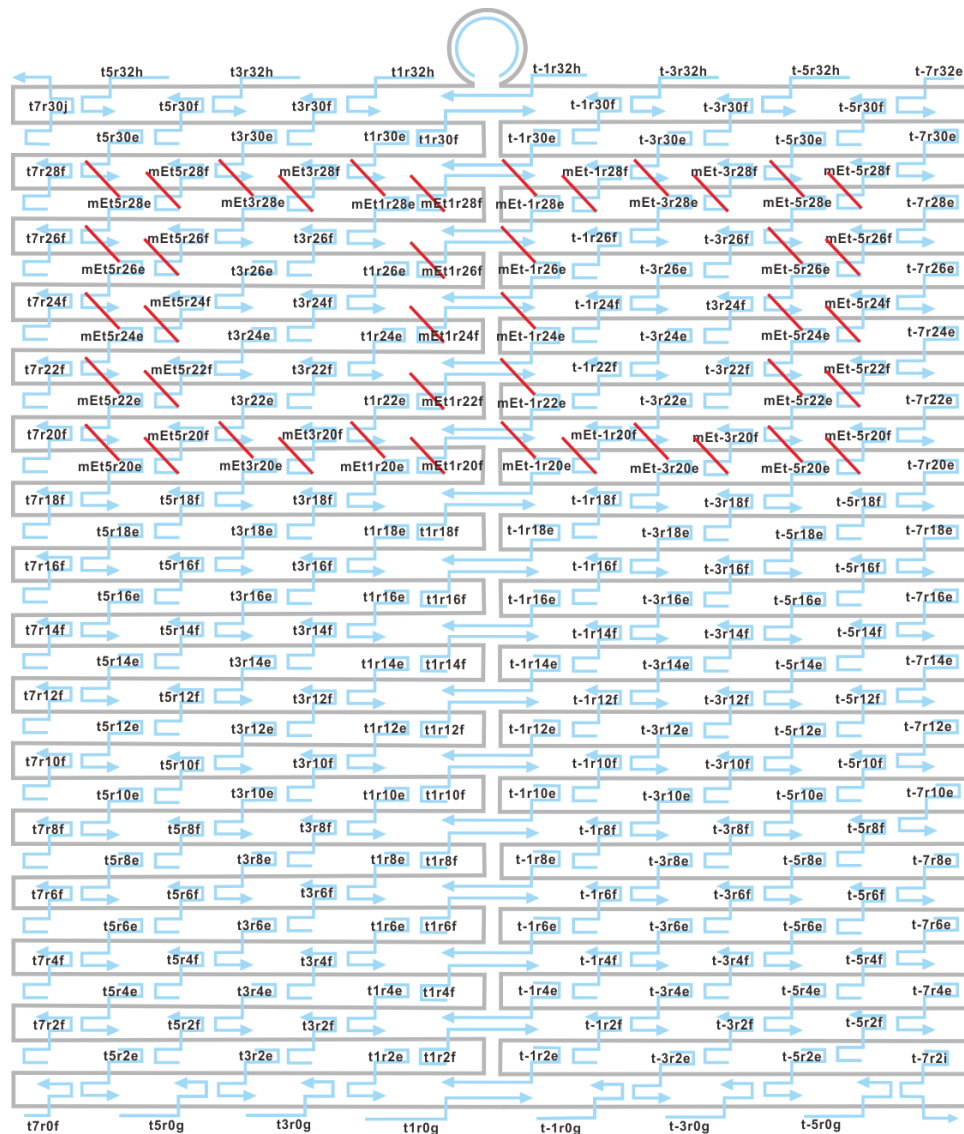

**Supplementary Figure 24. Schematic representation of *miniaturized digit 8* pattern on tall rectangular DNA origami.**

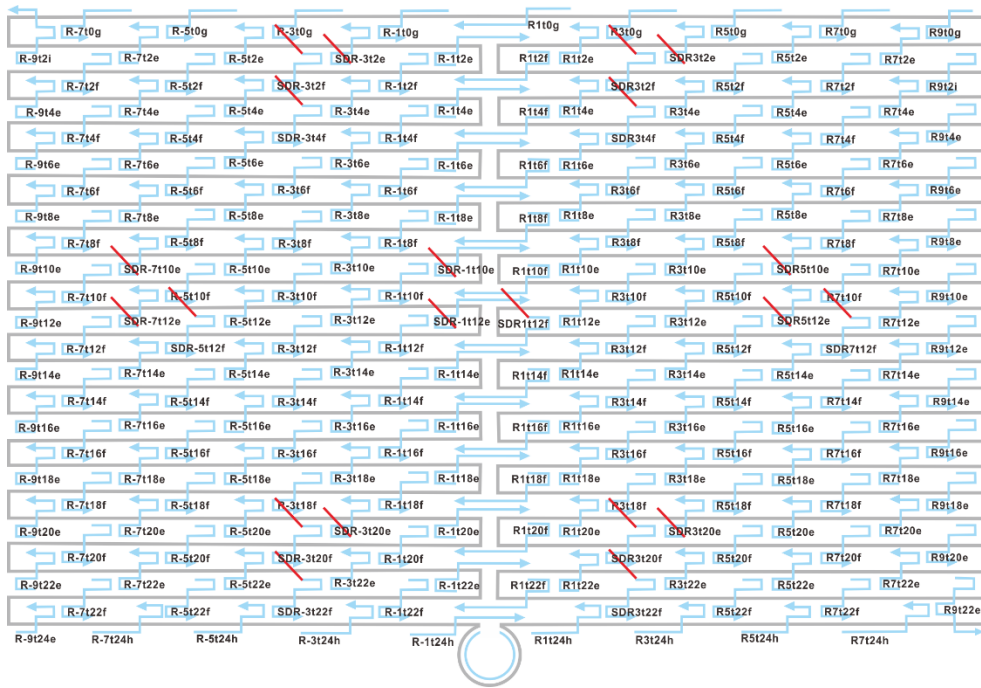

**Supplementary Figure 25. Schematic representation of *seven-dot* pattern on rectangular DNA origami.**

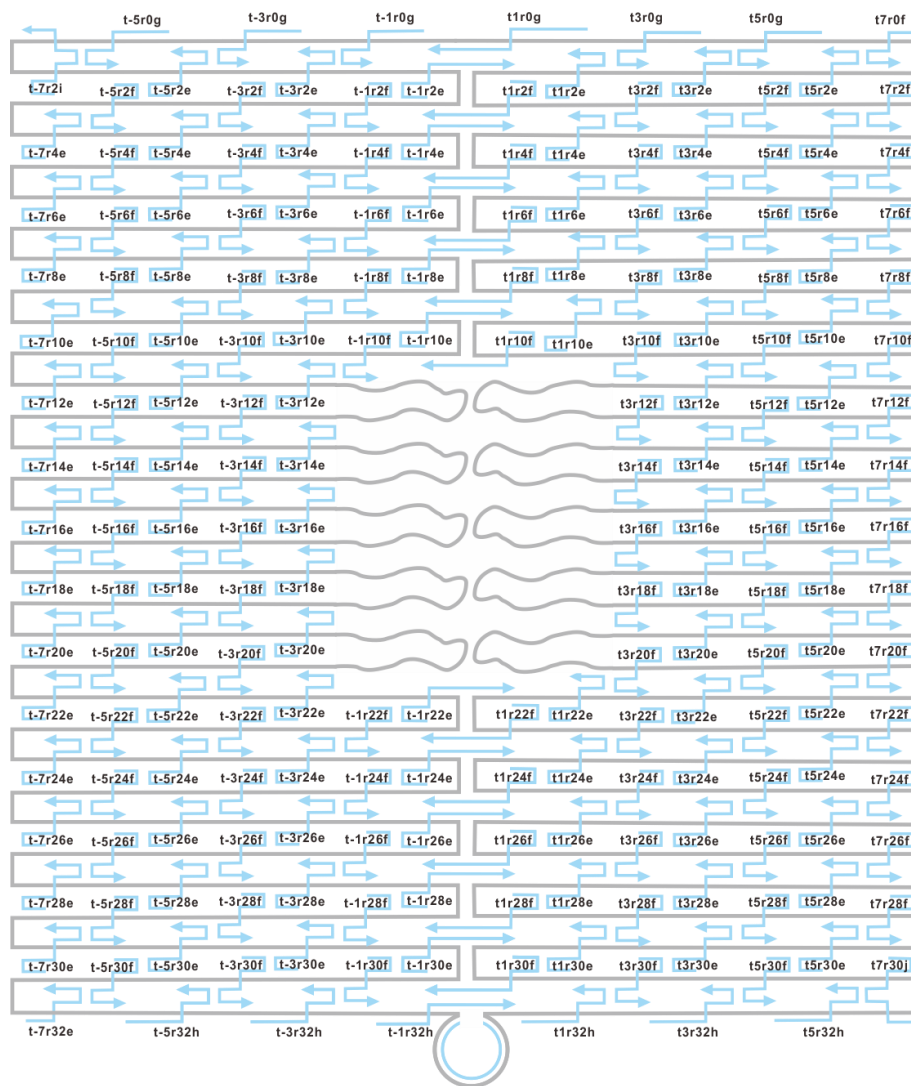

Supplementary Figure 26. Schematic representation of *rectangular block* pattern on tall rectangular DNA origami.

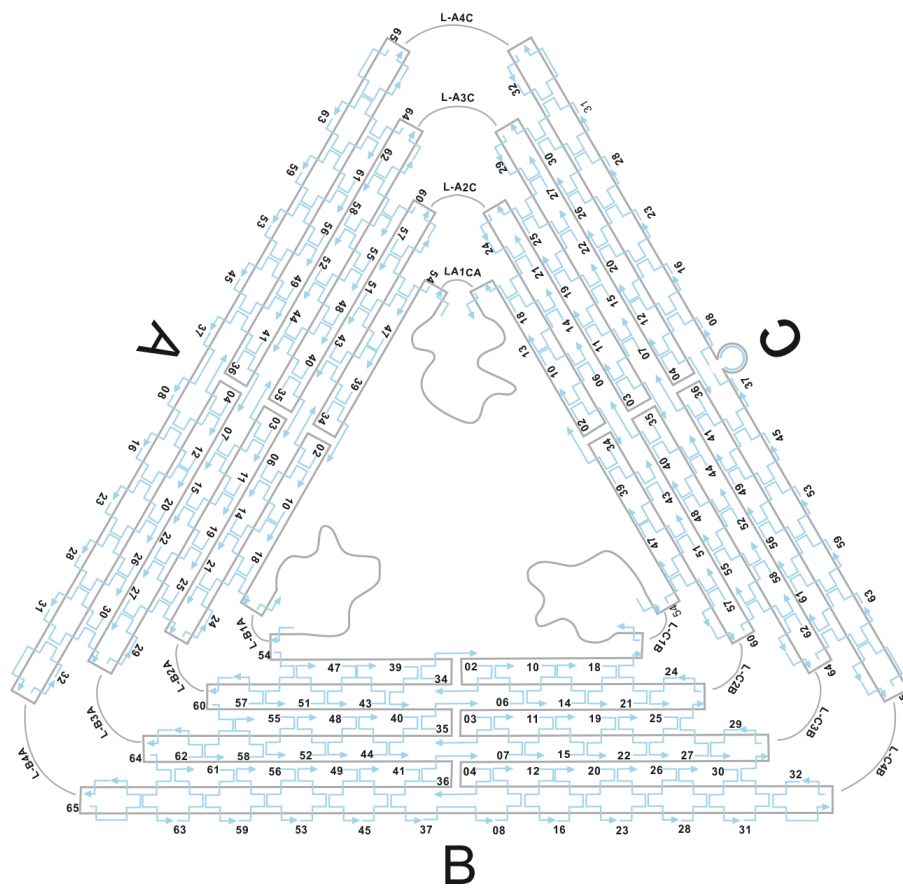

Supplementary Figure 27. Schematic representation of *three-dot* pattern on triangular DNA origami.

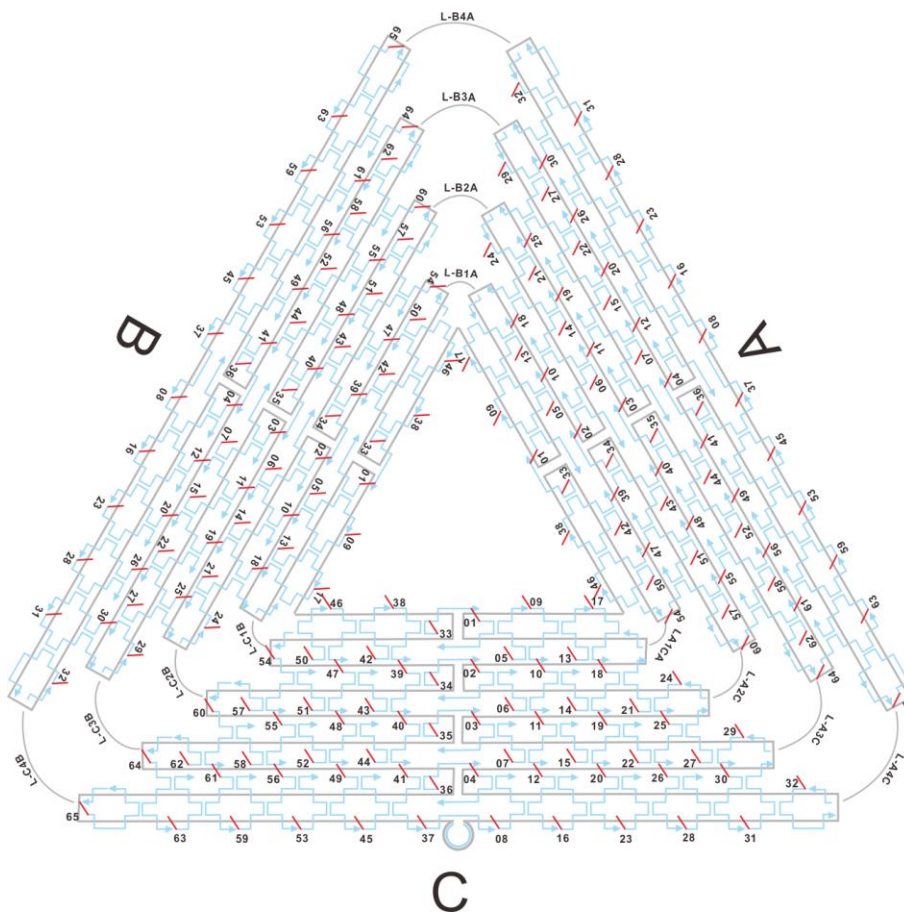

**Supplementary Figure 28. Schematic representation of triangle pattern on triangular DNA origami for STEM measurements of Cu and Ag elements.**

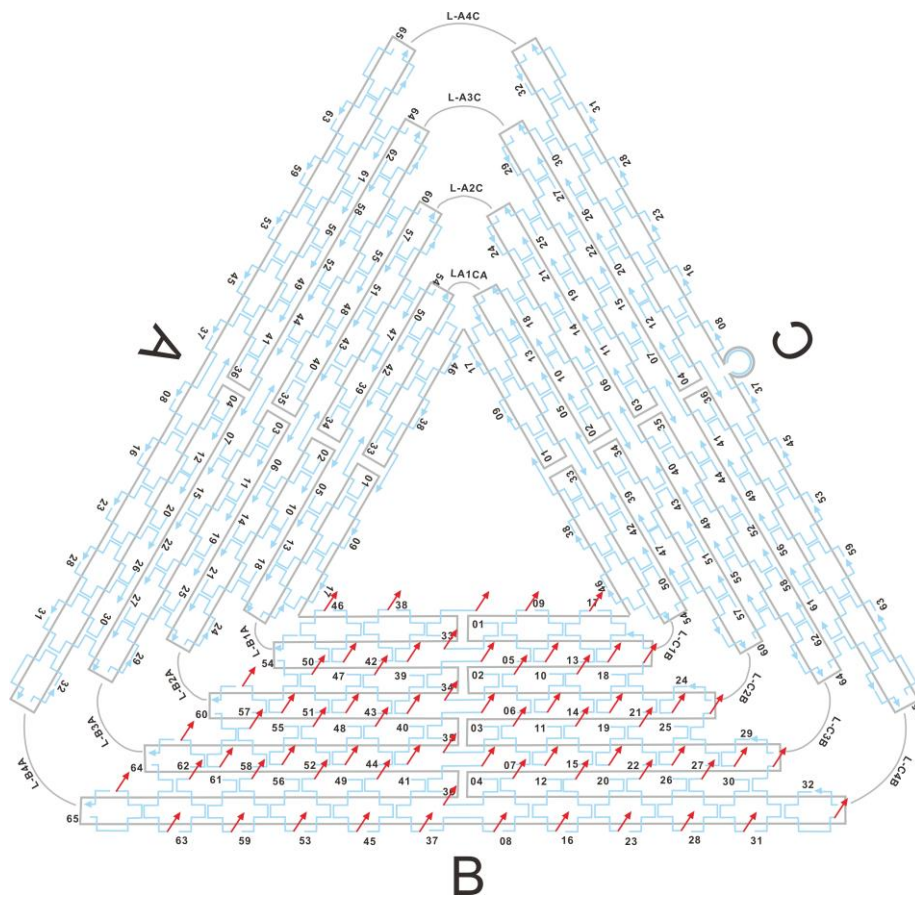

**Supplementary Figure 29. Schematic representation of the TdT catalyzed elongation of poly-dA overhangs on one arm of the triangle.**

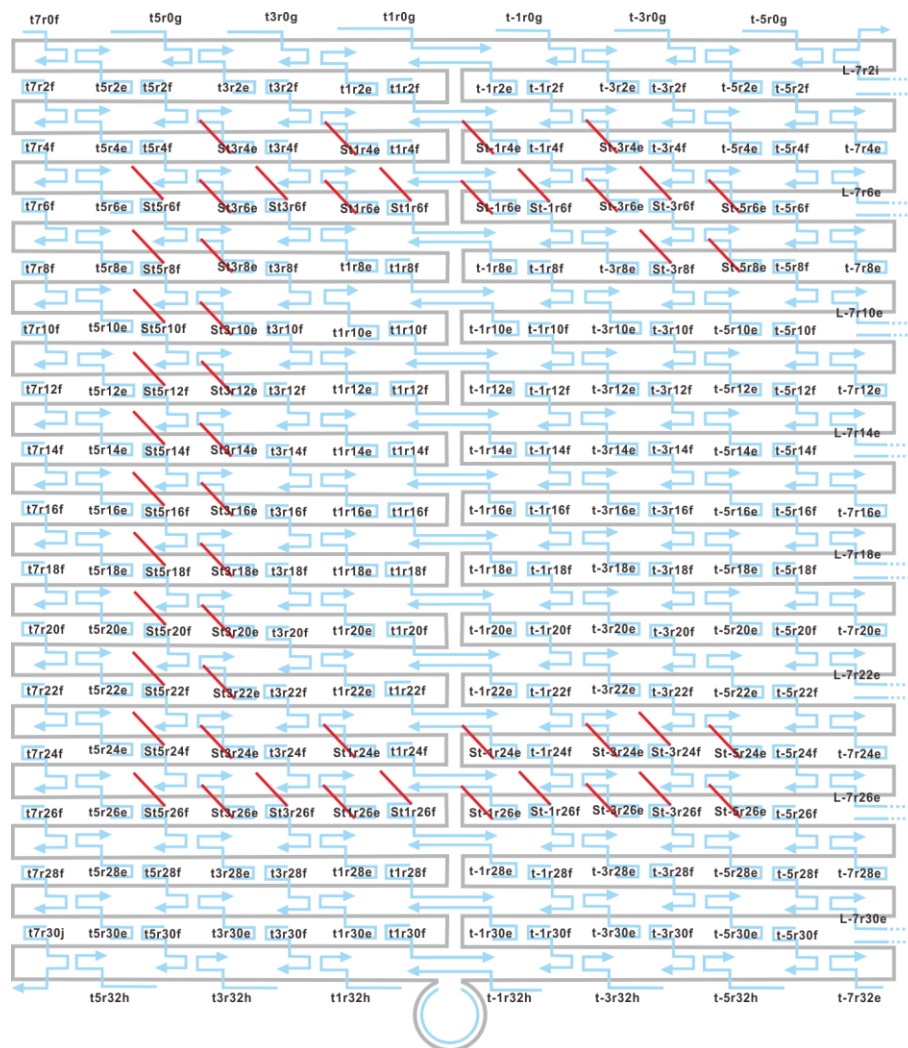

**Supplementary Figure 30. Schematic representation of C pattern on tall rectangular DNA origami. The dashed lines on the right were used for the assembly of the origami.**

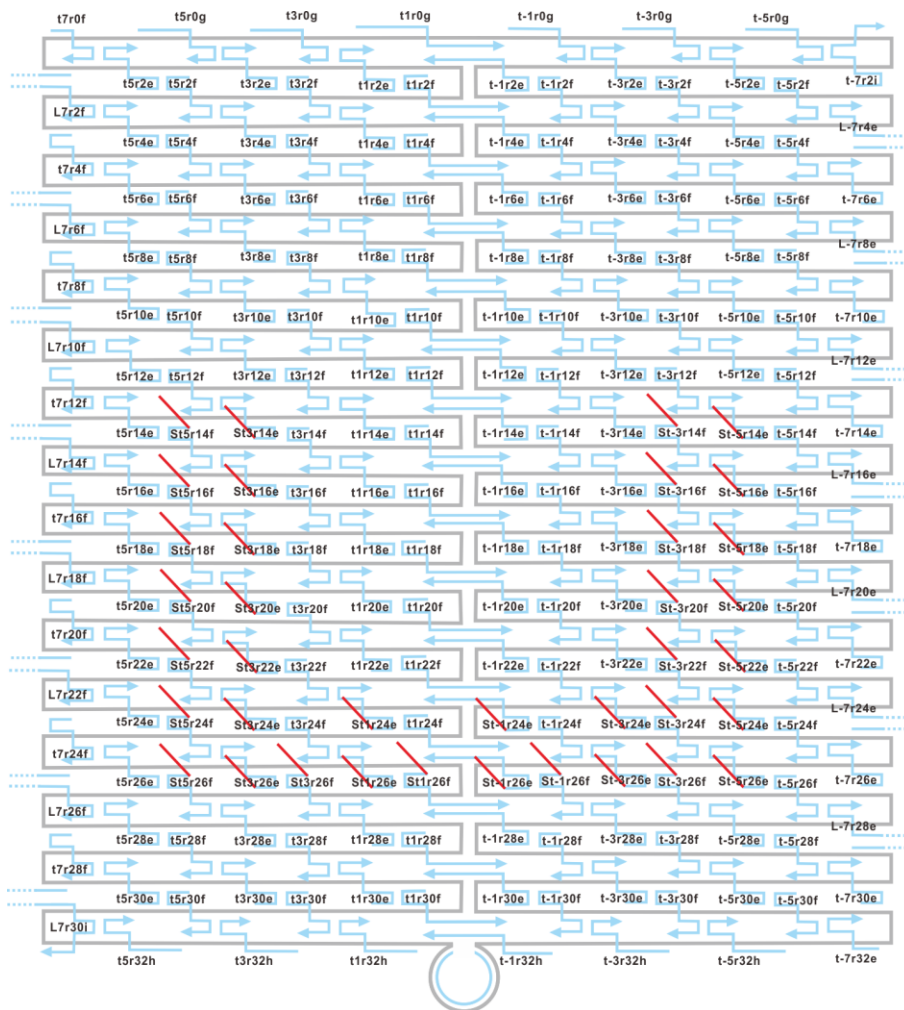

**Supplementary Figure 31. Schematic representation of  $u$  pattern on tall rectangular DNA origami. The dashed lines were used for the assembly of the origami.**



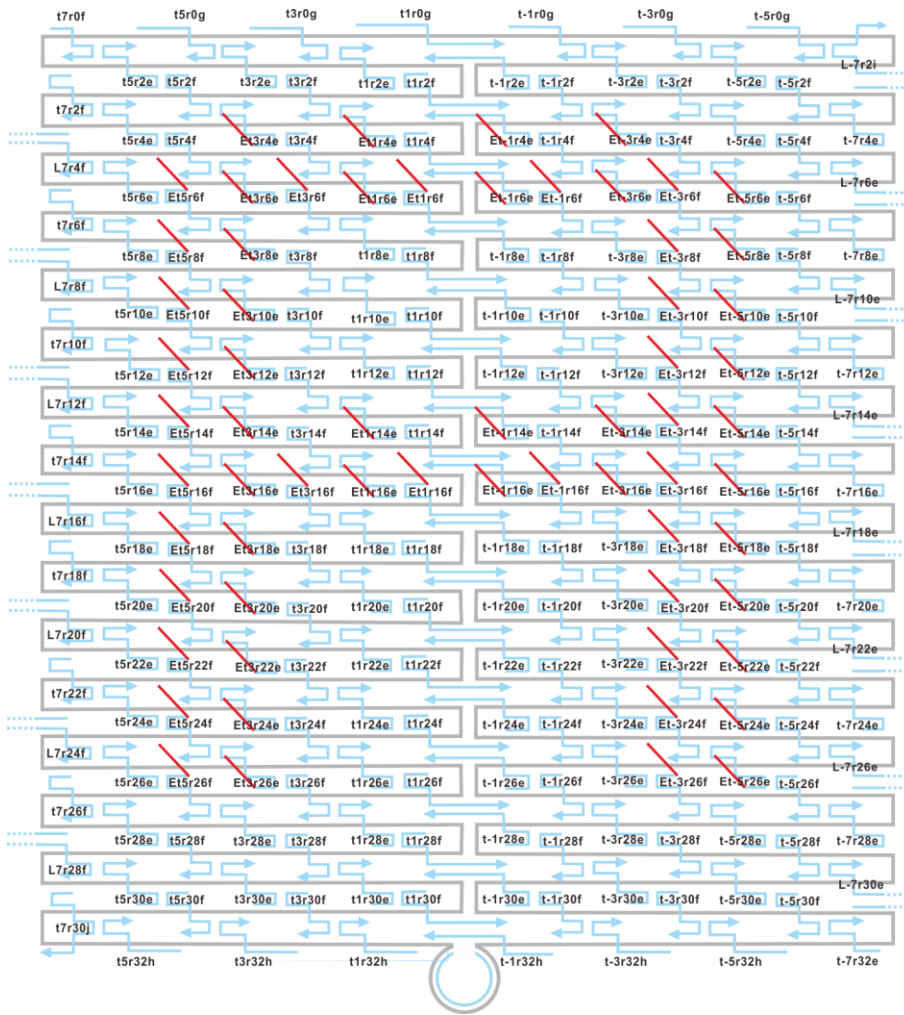

**Supplementary Figure 32. Schematic representation of *A* pattern on tall rectangular DNA origami. The dashed lines were used for the assembly of the origami.**

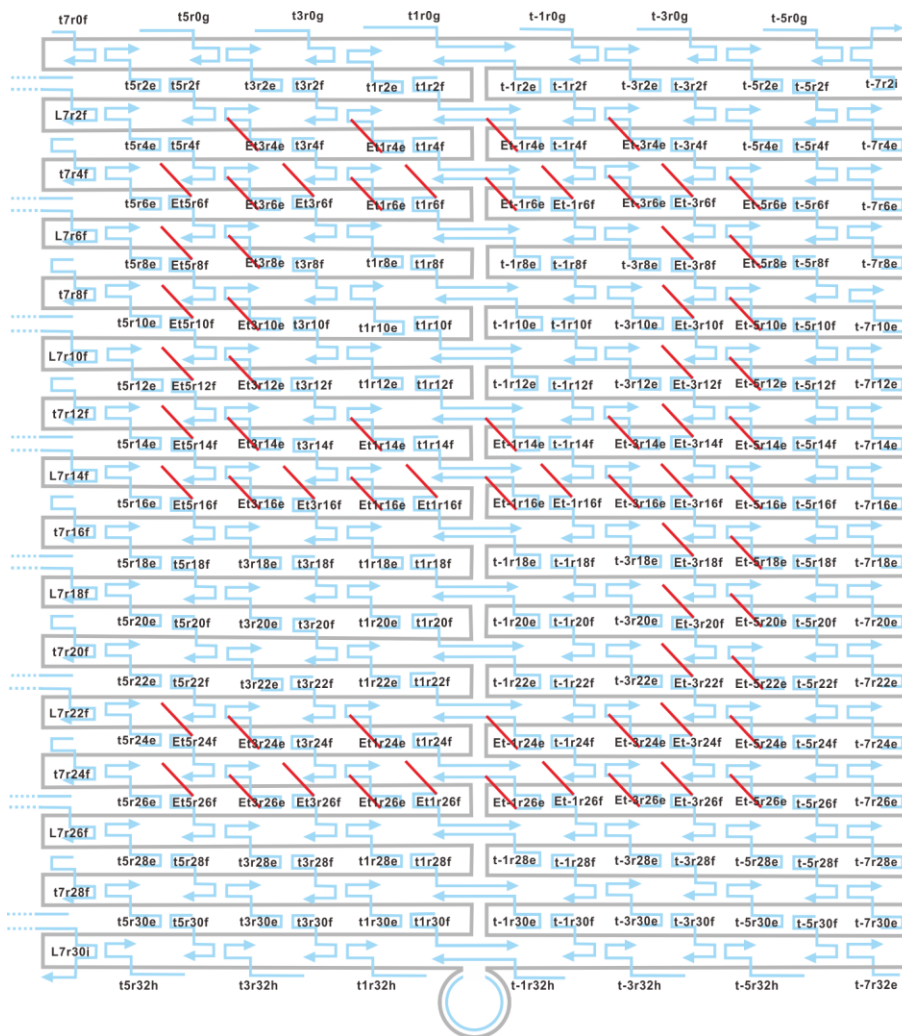

**Supplementary Figure 33. Schematic representation of *g* pattern on tall rectangular DNA origami. The dashed lines were used for the assembly of the origami.**

## Supplementary Notes:

### DNA sequences:

#### For seven-segment display:

SSR-7t6f: GACCTGACGACATAGACTTGAGAGAGCGACCTTTGAAAAGAAGCTGGCTCATTATTTAATAAAA  
SSR-7t8f: GACCTGACGACATAGACTTGAGAGAGCGACACGAAGTACGCTCCAATACTGCGGAATGCTTT  
SSR-7t10f: GACCTGACGACATAGACTTGAGAGAGCGACAAACAGTTGATGGCTTAGAGCTTATTTAAATA  
SSR-7t12f: GACCTGACGACATAGACTTGAGAGAGCGACTGCAACTAAGCAATAAAGCCTCAGTTATGACC  
SSR-7t14f: GACCTGACGACATAGACTTGAGAGAGCGACCTGTAATATTGCTGAGAGTCTGGAAAAGTAG  
SSR-7t16f: GACCTGACGACATAGACTTGAGAGAGCGACCATGTCAGATTCTCCGTGGGAACCGTTGGTG  
SSR-7t4e: GACCTGACGACATAGACTTGAGAGAGCGACCTCCATGAGAGGCTTTGAGGACTAGGGAGTT  
SSR-7t6e: GACCTGACGACATAGACTTGAGAGAGCGACCGATTTTAGAGGACAGATGAACGGCGCGACCT  
SSR-7t8e: GACCTGACGACATAGACTTGAGAGAGCGACTGGATAACGGAACAACATTATTACCTTATG  
SSR-7t10e: GACCTGACGACATAGACTTGAGAGAGCGACTTTTTGCGCAGAAAACGAGAATGAATGTTTAG  
SSR-7t12e: GACCTGACGACATAGACTTGAGAGAGCGACAAAATTAAGTACGGTGTCTGGAAGAGGTCA  
SSR-7t14e: GACCTGACGACATAGACTTGAGAGAGCGACTCAGGTCATTTTGC GG GAGAAGCAGAATTAG  
SSR-7t16e: GACCTGACGACATAGACTTGAGAGAGCGACACCCGTCGTATGTACCCCGTAAAGGCTA  
SSR-5t4f: GACCTGACGACATAGACTTGAGAGAGCGACTTTCATGAAAATTGTGTCGAAATCTGTACAGA  
SSR-5t18f: GACCTGACGACATAGACTTGAGAGAGCGACGTTTGAGGGAAAGGGGATGTCTAGAGGATC  
SSR-5t2e: GACCTGACGACATAGACTTGAGAGAGCGACATATATTCTTTTTACGTTGAAAATAGTTAG  
SSR-5t4e: GACCTGACGACATAGACTTGAGAGAGCGACCGCTGATGGAAGTTTCCATTAACATAACCG  
SSR-5t16e: GACCTGACGACATAGACTTGAGAGAGCGACCTTTCATCCCCAAAACAGGAAGACCGGAGAG  
SSR-5t18e: GACCTGACGACATAGACTTGAGAGAGCGACAGCTGGCGGACGACAGATATCGTAGCCAG  
SSR-3t4f: GACCTGACGACATAGACTTGAGAGAGCGACATACGTA AAAAGTACAACGGAGATTTTCATCAAG  
SSR-3t18f: GACCTGACGACATAGACTTGAGAGAGCGACGAAGATCGGTGCGGGCCTTTCGCAATCATGG  
SSR-3t2e: GACCTGACGACATAGACTTGAGAGAGCGACCAATGACACTCCAAAAGGAGCCTTACAACGCC  
SSR-3t4e: GACCTGACGACATAGACTTGAGAGAGCGACGGAACATGCCACTACGAAGGCATGCGCCGA  
SSR-3t16e: GACCTGACGACATAGACTTGAGAGAGCGACAAAATAATTTAAATTGTAAACGTTGATTTCA  
SSR-3t18e: GACCTGACGACATAGACTTGAGAGAGCGACGGCGATCGCACTCCAGCCAGCTTTGCCATCAA  
SSR-1t2f: GACCTGACGACATAGACTTGAGAGAGCGACTCGGTTTAGCTTGATACCGATAGTCCAACCTA  
SSR-1t4f: GACCTGACGACATAGACTTGAGAGAGCGACAAACGAAATGACCCCCAGCGATTATTCATTAC  
SSR-1t18f: GACCTGACGACATAGACTTGAGAGAGCGACGCTTCTGGTCAGGCTGCGCAACTGTGTTATCC  
SSR-1t2e: GACCTGACGACATAGACTTGAGAGAGCGACCTTAAACATCAGCTTGCTTTCGAGAAAACAGTT  
SSR-1t4e: GACCTGACGACATAGACTTGAGAGAGCGACCTCATCTTGAGGCAAAAAGAATACACTCCCTCA  
SSR-1t6e: GACCTGACGACATAGACTTGAGAGAGCGACGAATAAGGACGTAACAAAAGCTGTGACGGAAA  
SSR-1t8e: GACCTGACGACATAGACTTGAGAGAGCGACCAATAACCCGAGGCATAGTAAGAGCTTTTAAAG  
SSR-1t10e: GACCTGACGACATAGACTTGAGAGAGCGACTTTTAAATTGCCGAAAAGACTTCAATTCCAGAG  
SSR-1t12e: GACCTGACGACATAGACTTGAGAGAGCGACTTTCATTTGGTCAATAACCTGTTTAAATCAATA  
SSR-1t14e: GACCTGACGACATAGACTTGAGAGAGCGACAGACAGTCATTCAAAGGGTGAGATATCATAT  
SSR-1t16e: GACCTGACGACATAGACTTGAGAGAGCGACGCTCATTTTCGCATTAATTTTGAGCTTAGA  
SSR-1t18e: GACCTGACGACATAGACTTGAGAGAGCGACTTCGCCATTGCCGAAAACAGGCAAACAGTAC  
SSR1t4f: GACCTGACGACATAGACTTGAGAGAGCGACGAGCCGCCACCACCGGAACCGCTAAAACA  
SSR1t6f: GACCTGACGACATAGACTTGAGAGAGCGACTTATTCATAGGGAAGGTAAATATTCATTAGT  
SSR1t8f: GACCTGACGACATAGACTTGAGAGAGCGACAAAAGTAATATCTTACCGAAGCCCAACACTAT  
SSR1t10f: GACCTGACGACATAGACTTGAGAGAGCGACCTAATTTACGTAACGAGCGTCTATATCGCG  
SSR1t12f: GACCTGACGACATAGACTTGAGAGAGCGACATCGGCTGCGAGCATGTAGAAACCAGCTATAT  
SSR1t14f: GACCTGACGACATAGACTTGAGAGAGCGACGCTTATAGAAAAGCCTGTTTAGAAGGCCGG  
SSR1t16f: GACCTGACGACATAGACTTGAGAGAGCGACTTAAAGACGTTGAAAACATAGCGATTTAAATCA  
SSR1t18f: GACCTGACGACATAGACTTGAGAGAGCGACCTTTTACACAGATGAATATACAGTAAGCGCCA  
SSR1t2e: GACCTGACGACATAGACTTGAGAGAGCGACTGCCTTGACTGCCTATTTTCGGAACAGGGATAG  
SSR1t4e: GACCTGACGACATAGACTTGAGAGAGCGACAACCAGAGACCCTCAGAACCAGCCAGGGGTCAG  
SSR1t16e: GACCTGACGACATAGACTTGAGAGAGCGACTAGAATCCCTGAGAAGAGTCAATAGGAATCAT  
SSR1t18e: GACCTGACGACATAGACTTGAGAGAGCGACTTAAACGTTTCGGGAGAAAACAATAATTTCCCT  
SSR3t4f: GACCTGACGACATAGACTTGAGAGAGCGACGCCACCCTTTTTCATAATCAAACCGTCACC  
SSR3t18f: GACCTGACGACATAGACTTGAGAGAGCGACCTGATTGAAAGAAATTGCGTAGACCCGAACG  
SSR3t2e: GACCTGACGACATAGACTTGAGAGAGCGACAGTGTACTTGAAAGTATTAAGAGGCCGCCACC  
SSR3t4e: GACCTGACGACATAGACTTGAGAGAGCGACGTTTGCCACCTCAGAGCCGCCACCAGATACAGG  
SSR3t16e: GACCTGACGACATAGACTTGAGAGAGCGACCTGTAAATCATAGGTCTGAGAGACGATAATA

SSR3t18e: GACCTGACGACATAGACTTGAGAGAGCGACACAGAAATCTTTGAATACCAAGTTCCTTGCTT  
SSR5t4f: GACCTGACGACATAGACTTGAGAGAGCGACCACCAGAGTTCGGTCATAGCCCCGCCAGCAA  
SSR5t18f: GACCTGACGACATAGACTTGAGAGAGCGACGCGCAGAGATATCAAAATTATTTGACATTATC  
SSR5t2e: GACCTGACGACATAGACTTGAGAGAGCGACTAAGCGTCAAGGATTAGGATTAGTACCGCCA  
SSR5t4e: GACCTGACGACATAGACTTGAGAGAGCGACTCGGCATTCCGCCGCCAGCATTGACGTTCCAG  
SSR5t16e: GACCTGACGACATAGACTTGAGAGAGCGACAAATCAATGGCTTAGGTTGGGTTACTAAATTT  
SSR5t18e: GACCTGACGACATAGACTTGAGAGAGCGACAACCTACC CGGAATTATTCATTCCAGTACAT  
SSR7t4f: GACCTGACGACATAGACTTGAGAGAGCGACTGAGGCGGGCTCAGACTGTAGCGTAGCAAGG  
SSR7t6f: GACCTGACGACATAGACTTGAGAGAGCGACCCGGAAAACACCACCGGAATAAGTAAGACTCC  
SSR7t8f: GACCTGACGACATAGACTTGAGAGAGCGACTTATTACGGTCAGAGGGTAATTGAATAGCAGC  
SSR7t10f: GACCTGACGACATAGACTTGAGAGAGCGACTTTACAGTTAGCGAACCTCCCGACTAGGAA  
SSR7t12f: GACCTGACGACATAGACTTGAGAGAGCGACTCATTACCCGACAATAAACACATATTTAGGC  
SSR7t14f: GACCTGACGACATAGACTTGAGAGAGCGACAGAGGCATAATTTTCATCTTCTGACTATAACTA  
SSR7t16f: GACCTGACGACATAGACTTGAGAGAGCGACTATGTAAACCTTTTTTAATGGAAAAATTACCT  
SSR7t18f: GACCTGACGACATAGACTTGAGAGAGCGACGACGACAAAACTTCTGAATAATGGAAAGGAG  
SSR7t4e: GACCTGACGACATAGACTTGAGAGAGCGACTGCCTTTAGTCAGACGATTGGCCTGCCAGAAT  
SSR7t6e: GACCTGACGACATAGACTTGAGAGAGCGACACGCAAAGGTCACCAATGAAACCAATCAAGTT  
SSR7t8e: GACCTGACGACATAGACTTGAGAGAGCGACTGAACAAACAGTATGTTAGCAAATAAAAGAA  
SSR7t10e: GACCTGACGACATAGACTTGAGAGAGCGACGAGGCGTTAGAGAATAACATAAAAGAACCC  
SSR7t12e: GACCTGACGACATAGACTTGAGAGAGCGACCCAGACGAGCGCCAATAGCAAGCAAGAACGC  
SSR7t14e: GACCTGACGACATAGACTTGAGAGAGCGACTTTTAGTTTTTCGAGCCAGTAATAAATTCTGT  
SSR7t16e: GACCTGACGACATAGACTTGAGAGAGCGACTGAATTATGCTGATGCAAATCCACAAATATA  
Other sequences can be found in the sequences list for the rectangle origami<sup>4</sup>.

**For the *eight-dot* pattern:**

EDR-7t4e: AGAGTCTGACATGCTGCTCCATGAGAGGCTTTGAGGACTAGGGAGTT  
EDR-7t6e: AGAGTCTGACATGCTCGATTTAGAGGACAGATGAACGGCGCGACCT  
EDR-5t6f: AGAGTCTGACATGCTCCAGGCGCTTAATCATTGTGAATTACAGGTAG  
EDR-7t16e: AGAGTCTGACATGCTACCCGTCGTCATATGTACCCGGTAAAGGCTA  
EDR-7t18e: AGAGTCTGACATGCTATTAAGTTCGCATCGTAACCGTGCGAGTAACA  
EDR-5t18f: AGAGTCTGACATGCTGTTGAGGGAAAGGGGATGTGCTAGAGGATC  
EDR-1t4e: AGAGTCTGACATGCTCTCATCTTGAGGCAAAAAGAATACACTCCCTCA  
EDR1t4f: AGAGTCTGACATGCTGAGCCGCCACCACCGGAACCGCCTAAAACA  
EDR-1t12e: AGAGTCTGACATGCTTTTCATTTGGTCAATAACCTGTTTAAATCAATA  
EDR1t12f: AGAGTCTGACATGCTATCGGCTGCGAGCATGTAGAAACCAGCTATAT  
EDR-1t20e: AGAGTCTGACATGCTGCATAAAGTTCCACACAACATACGAAACAATT  
EDR1t20f: AGAGTCTGACATGCTCGACAATAAGTATTAGACTTTACAGCCGAA  
EDR7t4f: AGAGTCTGACATGCTTGAGGACGGCTCAGACTGTAGCGTAGCAAGG  
EDR7t12f: AGAGTCTGACATGCTTATTACCCGACAATAAACACATATTTAGGC  
EDR7t20f: AGAGTCTGACATGCTCGGAATTATTGAAAGGAATTGAGGTGAAAAAT  
Other sequences can be found in the sequences list for the rectangle origami<sup>4</sup>.

**For *seven-dot* pattern:**

SDR-7t10e: AGACTCTAACCTGCAGTCACAACAGTACGCTTTTTGCGCAGAAAACGAGAATGAATGTTTAG  
SDR-7t12e: AGACTCTAACCTGCAGTCACAACAGTACGCCAAAATTAAAGTACGGTGTCTGGAAGAGGTCA  
SDR-5t12f: AGACTCTAACCTGCAGTCACAACAGTACGCTCCATATACATACAGGCAAGGCAACTTTATTT  
SDR-3t2f: AGACTCTAACCTGCAGTCACAACAGTACGCAAAAAGGACAACCATCGCCACGCGGGTAAA  
SDR-3t4f: AGACTCTAACCTGCAGTCACAACAGTACGCATACGTAAGTACAACGGAGATTTCATCAAG  
SDR-3t2e: AGACTCTAACCTGCAGTCACAACAGTACGCCAATGACACTCCAAAAGGAGCCTTACAACGCC  
SDR-3t20f: AGACTCTAACCTGCAGTCACAACAGTACGCTCATAGCTACTCACATTAATTGCGCCCTGAGA  
SDR-3t22f: AGACTCTAACCTGCAGTCACAACAGTACGCGAGTTGACAGATAGGGTTGAGTAAGGGAGC  
SDR-3t20e: AGACTCTAACCTGCAGTCACAACAGTACGCGTAGCTAGTTTCTGTGTGAAATTTGGGAAG  
SDR-1t10e: AGACTCTAACCTGCAGTCACAACAGTACGCTTTTAAATTGCCGAAAAGACTTCAATTCCAGAG  
SDR-1t12e: AGACTCTAACCTGCAGTCACAACAGTACGCTTTCATTTGGTCAATAACCTGTTTAAATCAATA  
SDR1t12f: AGACTCTAACCTGCAGTCACAACAGTACGCATCGGCTGCGAGCATGTAGAAAACCAGCTATAT  
SDR3t2f: AGACTCTAACCTGCAGTCACAACAGTACGCCTGAAAACAGGTAATAAGTTTTAACCCCTCAGA  
SDR3t4f: AGACTCTAACCTGCAGTCACAACAGTACGCGCCACCCTTTTTCATAATCAAACCGTCACC

SDR3i2e: AGACTCTAACCTGCAGTCACAACAGTACGCAGTGTACTTGAAAGTATTAAGAGGCCGCCACC  
SDR3i20f: AGACTCTAACCTGCAGTCACAACAGTACGCTTATTAATGCCGTCAATAGATAATCAGAGGTG  
SDR3i22f: AGACTCTAACCTGCAGTCACAACAGTACGCAGGCGGTCATTAGTCTTTAATGCGCAATATTA  
SDR3i20e: AGACTCTAACCTGCAGTCACAACAGTACGCAGATTAGATTTAAAAGTTTGAGTACACGTAA  
SDR5t10e: AGACTCTAACCTGCAGTCACAACAGTACGCAGTTTTGAACGTCAAAAATGAAAGCGCTAAT  
SDR5t12e: AGACTCTAACCTGCAGTCACAACAGTACGCAATGCAGACCGTTTTTATTTCATCTTGCGGG  
SDR7t12f: AGACTCTAACCTGCAGTCACAACAGTACGCTATTACCCGACAATAAACATATTTAGGC

Other sequences can be found in the sequences list for the rectangle origami<sup>4</sup>.

### For the *rectangular block* pattern:

The following sequences in the tall rectangular origami were removed:

t1r12e, t1r14e, t1r16e, t1r18e, t1r20e, t1r12f, t1r14f, t1r16f, t1r18f, t1r20f, t-1r12e, t-1r14e, t-1r16e, t-1r18e, t-1r20e, t-1r12f, t-1r14f, t-1r16f, t-1r18f, t-1r20f.

Other sequences can be found in the sequences list for the tall rectangular origami<sup>4</sup>.

### For the *three-dot* pattern:

The following sequences in the triangular origami were removed:

A01, A05, A09, A13, A17, A33, A38, A42, A46, A50, B01, B05, B09, B13, B17, B33, B38, B42, B46, B50, C01, C05, C09, C13, C17, C33, C38, C42, C46, C50.

Other sequences can be found in the sequences list for the triangular origami<sup>4</sup>.

### For the small *digit 8* pattern:

mEt5r28e: GACCTGACGACATAGACTTGAGAGAGCGACGAAATGGAAAACATCGCCATTAACAGAGGTG  
mEt5r26e: GACCTGACGACATAGACTTGAGAGAGCGACAGCGGTCTCTTTAGGAGCACTAAACATTTGA  
mEt5r24e: GACCTGACGACATAGACTTGAGAGAGCGACGGATTTAGTTCATCAATATAATCCAGGGTTAG  
mEt5r22e: GACCTGACGACATAGACTTGAGAGAGCGACAACCTACCGGAATTATTCATTTACATCAAG  
mEt5r20e: GACCTGACGACATAGACTTGAGAGAGCGCAAAAACAACTGAGAAGAGTCAATATACCTTTT  
mEt5r28f: GACCTGACGACATAGACTTGAGAGAGCGACTAGCCCTATTATTTACATTGGCAGCAATATTA  
mEt5r26f: GACCTGACGACATAGACTTGAGAGAGCGACCTAAAATAAGTATTAACACCGCCTCGAACTGA  
mEt5r24f: GACCTGACGACATAGACTTGAGAGAGCGACGATGGCAAAAAGTATTAGACTTTACAAGTTAT  
mEt5r22f: GACCTGACGACATAGACTTGAGAGAGCGACGCGCAGAGATATCAAAATTATTTGTATCAGAT  
mEt5r20f: GACCTGACGACATAGACTTGAGAGAGCGACTTAAAGACGATTAATTACATTTAACACAAAATC  
mEt3r28e: GACCTGACGACATAGACTTGAGAGAGCGACGTCACACGATTAGTCTTTAATGCGGCAACAGT  
mEt3r20e: GACCTGACGACATAGACTTGAGAGAGCGACTTGAATTATTGAAAACATAGCGATTATAACTA  
mEt3r28f: GACCTGACGACATAGACTTGAGAGAGCGACGAATGGCTACCAGTAATAAAAAGGGCAAACCTAT  
mEt3r20f: GACCTGACGACATAGACTTGAGAGAGCGACTAGAATCCCCTTTTTAATGGAAACGGATTTCG  
mEt1r28e: GACCTGACGACATAGACTTGAGAGAGCGACGCCAACAGATACGTGGCAGACATGAAAAAT  
mEt1r20e: GACCTGACGACATAGACTTGAGAGAGCGACAAAATCAATCGTCGCTATTAATTAATCGCAAG  
mEt1r28f: GACCTGACGACATAGACTTGAGAGAGCGACGCGTAAGAAGATAGAACCCTTCTGAACGCGCG  
mEt1r26f: GACCTGACGACATAGACTTGAGAGAGCGACAAAACCCTCTCACCTTGCTGAACCTAGAGGATC  
mEt1r24f: GACCTGACGACATAGACTTGAGAGAGCGACATTTTGCCTTTAAAAGTTTGAGTACCGGCACC  
mEt1r22f: GACCTGACGACATAGACTTGAGAGAGCGACCTTTTACACAGATGAATATACAGTGCCATCAA  
mEt1r20f: GACCTGACGACATAGACTTGAGAGAGCGACCTGTAAATATATGTGAGTGAATAAAAAGGCTA  
mEt-1r28e: GACCTGACGACATAGACTTGAGAGAGCGACGGGAGAGGCATTAATGAATCGGCCACCTGAAA  
mEt-1r26e: GACCTGACGACATAGACTTGAGAGAGCGACCCCGGTACCTGCAGGTCGACTCTCAAATATC  
mEt-1r24e: GACCTGACGACATAGACTTGAGAGAGCGACGCTTCTGGCACTCCAGCCAGCTTTACATTATC  
mEt-1r22e: GACCTGACGACATAGACTTGAGAGAGCGACAAAATAATTTTAACCAATAGGAACAACAGTAC  
mEt-1r20e: GACCTGACGACATAGACTTGAGAGAGCGACTCAGGTCATTTTGGAGAGATCTACCTTGCTT  
mEt-1r28f: GACCTGACGACATAGACTTGAGAGAGCGACGCCAGCTGCGGTTTGGCTATTGGAATCAAAA  
mEt-1r20f: GACCTGACGACATAGACTTGAGAGAGCGACGGTAGCTATTGCCTGAGAGTCTGGTTAAATCA  
mEt-3r28e: GACCTGACGACATAGACTTGAGAGAGCGACTGGTTTTTCTTTCCAGTCCGGAAAAATCATGG  
mEt-3r20e: GACCTGACGACATAGACTTGAGAGAGCGACAGAGAATCAGCTGATAAATTAATGCTTTATTT  
mEt-3r28f: GACCTGACGACATAGACTTGAGAGAGCGACACTGCCCGCTTTTACCAGTGAGATGGTGGTT  
mEt-3r20f: GACCTGACGACATAGACTTGAGAGAGCGACACCGTTCTGATGAACGGTAATCGTAATATTTT  
mEt-5r28e: GACCTGACGACATAGACTTGAGAGAGCGACAGCTGATTACTCACATTAATTGCGTGTATCC  
mEt-5r26e: GACCTGACGACATAGACTTGAGAGAGCGACGCTACAAGGGTAACGCCAGGGTTTTGGGAAG  
mEt-5r24e: GACCTGACGACATAGACTTGAGAGAGCGACGGCATCGGCATCGTAACCGTCCGAGTAACA

mEt-5r22e: GACCTGACGACATAGACTTGAGAGAGCGACACCCGTCGTTAAATTGTAAACGTAAAACTAG  
mEt-5r20e: GACCTGACGACATAGACTTGAGAGAGCGACCATGTCAAAAATCACCATCAATATAACCCTCA  
mEt-5r28f: GACCTGACGACATAGACTTGAGAGAGCGACGTGAGCTAGCCCTTCACCGCCTGGGGTTTGCC  
mEt-5r26f: GACCTGACGACATAGACTTGAGAGAGCGACATTAAGTTTCCACACAACATAACGCCTAATGA  
mEt-5r24f: GACCTGACGACATAGACTTGAGAGAGCGACTAGATGGGGTGCGGCCCTTCGCGCAAGGCC  
mEt-5r22f: GACCTGACGACATAGACTTGAGAGAGCGACGCAAATATGATTCTCCGTGGGAACCGTTGGTG  
mEt-5r20f: GACCTGACGACATAGACTTGAGAGAGCGACAGACAGTCTCATATGTACCCCGTTTGTATAA

Other sequences can be found in the sequences list for the tall rectangle origami<sup>4</sup>.

### For the triangle origami patterns:

The sequence of 'AGACTAGACTAGACT' was used and linked to the 5 terminals of all the selected staple strands for the triangle DNA origami as shown in Fig. S28.

### For the C, u patterns:

S5r6f: CTACCTCCAGCACCGTAGGGAAGGTAAATATTTTATTTG  
S5r8f: CTACCTCCTCACAATCCCGAGGAAACGCAATAATGAAATA  
S5r10f: CTACCTCCGCAATAGCAGAGAATAACATAAAAAACAGCCAT  
S5r12f: CTACCTCCATTATTTATTAGCGAACCTCCCGACGTAGGAA  
S5r14f: CTACCTCCTCATTACCGAACAAGAAAAATAATAATTCTGT  
S5r16f: CTACCTCCCAGACGACAAATCTTACCAGTAGATAAATA  
S5r18f: CTACCTCCAGGCGTTAGGCTTAGGTTGGGTAAAGCTTAGA  
S5r20f: CTACCTCCTTAAGACGATTAATTACATTTAACACAAAATC  
S5r22f: CTACCTCCGCGCAGAGATATCAAAATATTTGTATCAGAT  
S5r24f: CTACCTCCGATGGCAAAAGTATTAGACTTTACAAGGTTAT  
S5r26f: CTACCTCCCTAAAATAAGTATTAACACCGCCTCGAACTGA  
S3r4e: CTACCTCCGTTTGCCACCTCAGAGCCGCCACCGCCAGAAT  
S3r6e: CTACCTCCTTATTCATGTCACCAATGAAACCATTATTAGC  
S3r8e: CTACCTCCATACCCAAACACCACGGAATAAGTGACGGAAA  
S3r10e: CTACCTCCGCGCATTAAATAAGAGCAAGAAACAATAACGGA  
S3r12e: CTACCTCCAGGTTTTGGCCAGTTACAAAATAAACAGGGAA  
S3r14e: CTACCTCCCTAATTTACCGTTTTTATTTTCATCTTGCGGG  
S3r16e: CTACCTCCACGCTCAACGACAAAAGGTAAAGTATCCCATC  
S3r18e: CTACCTCCTATGTAAAGAAATACCGACCGTGTTAAAGCCA  
S3r20e: CTACCTCCTTGAATTATTGAAAACATAGCGATTATAACTA  
S3r22e: CTACCTCCACAGAAATCTTTGAATACCAAGTTAATTCAT  
S3r24e: CTACCTCCCAGAACTTCATCATATTCTGTATCACGTAAA  
S3r26e: CTACCTCCGCCACGCTTTGAAAGGAATTGAGGAAACAATT  
S3r6f: CTACCTCCCCGAAACTAAAGGTGAATTATCATAAAAGAA  
S3r26f: CTACCTCCATCAACAGGAGAGCCAGCAGCAAAATATTTTT  
S1r4e: CTACCTCCAACCAGAGACCCTCAGAACCGCCACGTTCCAG  
S1r6e: CTACCTCCGACTTGAGGTAGCACCATTACCATATCACCGG  
S1r24e: CTACCTCCTTATTAATGAACAAAGAAACCACCTTTTCAGG  
S1r26e: CTACCTCCCTAAAGCAAATCAATATCTGGTCACCCGAACG  
S1r6f: CTACCTCCAATCACCAACATTTGGGAATTAGACCAACCTA  
S1r26f: CTACCTCAAACCCTCTCACCTTGCTGAACCTAGAGGATC  
St-1r4e: CTACCTCCCAATGACAGCTTGATACCGATAGTCTCCCTCA  
St-1r6e: CTACCTCAAACGAAATGCCACTACGAAGGCAGCCAGCAA  
St-1r24e: CTACCTCCGCTTCTGGCACTCCAGCCAGCTTTACATTATC  
St-1r26e: CTACCTCCCCGGGTACCTGCAGGTCGACTCTCAAATATC  
St-1r6f: CTACCTCCATACGTAAGAGGCAAAAAGAATACTGACCAA  
St-1r26f: CTACCTCCCTTGATGCGGAGCTCGAATTCGTCTGTCTGT  
St-3r4e: CTACCTCCATATATCTCAGCTTGCTTTTCGAGTGGGATTT  
St-3r6e: CTACCTCCCTCATCTTGGAAGTTTCCATTAACATAACCG  
St-3r24e: CTACCTCCTTCGCCATGGACGACGACAGTATCGTAGCCAG  
St-3r26e: CTACCTCCTCATAGCTTGTAACGACGGCCAAAGCGCCA  
St-3r6f: CTACCTCCTTCATGATGACCCCGAGGATTAAGGCGCAG  
St-3r8f: CTACCTCCACGGTCAATGACAAGAACCGGATATGGTTTAA

St-3r14f: CTACCTCCTCAGAAGCCTCCAACAGGTCAGGATTTAAATA  
 St-3r16f: CTACCTCCTGCAACTAGGTCAATAACCTGTTTAGAATTAG  
 St-3r18f: CTACCTCCCAAAATAGGATAAAAATTTTAGGATATTCA  
 St-3r20f: CTACCTCCACCGTTCTGATGAACGGTAATCGTAATATTTT  
 St-3r22f: CTACCTCCGTTAAAATAACATTAATGTGAGCATCTGCCA  
 St-3r24f: CTACCTCCGTTTGAGGTCAGGCTGCGCAACTGTTCCCAGT  
 St-3r26f: CTACCTCCCACGACGTGTTTCTGTGTGAAATTTGCGCTC  
 St-5r6e: CTACCTCCGCGAAACAAGAGGCTTTGAGGACTAGGGAGTT  
 St-5r8e: CTACCTCCCAAAATCATTACTTAGCCGGAACGTACCAAGC  
 St-5r14e: CTACCTCCTACCTTTAAGGTCCTTACCCTGACAATCGTCA  
 St-5r16e: CTACCTCCTTTTCAATTTCTGTAGCTCAACATGTTTAGAGAG  
 St-5r18e: CTACCTCCTATATTTTCATACAGGCAAGGCAAAGCTATAT  
 St-5r20e: CTACCTCCCATGTCAAAAATCACCATCAATATAACCCTCA  
 St-5r22e: CTACCTCCACCCGTCGTTAAATTGTAAACGTTAAAACCTAG  
 St-5r24e: CTACCTCCGGCGATCGCGCATCGTAACCGTGCGAGTAACA  
 St-5r26e: CTACCTCCGCTCACAAGGGTAACGCCAGGGTTTTGGGAAG  
 Other sequences can be found in the sequences list for the tall rectangle origami<sup>4</sup>.

SCu GGAGGTAGGACAAGCACGATACCATGCGTCTTCGGTAG

### For the *A*, *g* patterns:

Ei5r6f: CTTGGGTCGTAGACATCGACGACTACTGACAGCACCGTAGGGAAGGTAAATATTTTATTTG  
 Ei5r8f: CTTGGGTCGTAGACATCGACGACTACTGACTCACAATCCCGAGGAAACGCAATAATGAAATA  
 Ei5r10f: CTTGGGTCGTAGACATCGACGACTACTGACGCAATAGCAGAGAATAACATAAAAACAGCCAT  
 Ei5r12f: CTTGGGTCGTAGACATCGACGACTACTGACATTTATTATTAGCGAACCTCCCGACGTAGGAA  
 Ei5r14f: CTTGGGTCGTAGACATCGACGACTACTGACTCATTACCGAACAAGAAAAATAAATTTCTGT  
 Ei5r16f: CTTGGGTCGTAGACATCGACGACTACTGACCCAGACGACAAAATCTTACCAGTAGATAAATA  
 Ei5r18f: CTTGGGTCGTAGACATCGACGACTACTGACAGGCGTTAGGCTTAGGTTGGGTTAAGCTTAGA  
 Ei5r20f: CTTGGGTCGTAGACATCGACGACTACTGACTTAAGACGATTAATTACATTTAACACAAAATC  
 Ei5r22f: CTTGGGTCGTAGACATCGACGACTACTGACGCGCAGAGATATCAAAATTTTGTATCAGAT  
 Ei5r24f: CTTGGGTCGTAGACATCGACGACTACTGACGATGGCAAAAGTATTAGACTTTACAAGGTTAT  
 Ei5r26f: CTTGGGTCGTAGACATCGACGACTACTGACCTAAAATAAGTATTAACACCGCCTCGAACTGA  
 Ei3r4e: CTTGGGTCGTAGACATCGACGACTACTGACGTTTCCACCTCAGAGCCGCCACCGCCAGAAT  
 Ei3r6e: CTTGGGTCGTAGACATCGACGACTACTGACTTATTCATGTACCAATGAAACCATTATAGC  
 Ei3r8e: CTTGGGTCGTAGACATCGACGACTACTGACATACCCAAACACCACGGAATAAGTGACGAAA  
 Ei3r10e: CTTGGGTCGTAGACATCGACGACTACTGACGCGCATTAAATAAGAGCAAGAAACAATAACGGA  
 Ei3r12e: CTTGGGTCGTAGACATCGACGACTACTGACAGGTTTGGCCAGTTACAAAATAACAGGGAA  
 Ei3r14e: CTTGGGTCGTAGACATCGACGACTACTGACCTAATTTACCGTTTTATTTTCATCTTGC  
 Ei3r16e: CTTGGGTCGTAGACATCGACGACTACTGACACGCTCAACGACAAAAGGTAAAGTATCCCATC  
 Ei3r18e: CTTGGGTCGTAGACATCGACGACTACTGACTATGTAAGAAATACCGACCGTGTAAAGCCA  
 Ei3r20e: CTTGGGTCGTAGACATCGACGACTACTGACTTGAATTATTGAAAACATAGCGATTATAACTA  
 Ei3r22e: CTTGGGTCGTAGACATCGACGACTACTGACACAGAAATCTTTGAATACCAAGTTAATTCAT  
 Ei3r24e: CTTGGGTCGTAGACATCGACGACTACTGACCGACAACCTTCATCATATTCTGATCAGTAAA  
 Ei3r26e: CTTGGGTCGTAGACATCGACGACTACTGACGCCACGCTTTGAAAGGAATTGAGGAAACAATT  
 Ei3r6f: CTTGGGTCGTAGACATCGACGACTACTGACCCGAAACTAAAGGTGAATTATCATAAAAGAA  
 Ei3r16f: CTTGGGTCGTAGACATCGACGACTACTGACTAAAGTACCAGTAGGGCTTAATTGCTAAATTT  
 Ei3r26f: CTTGGGTCGTAGACATCGACGACTACTGACATCAACAGGAGGCCAGCAGCAAAATATTTT  
 Ei1r4e: CTTGGGTCGTAGACATCGACGACTACTGACAACAGAGACCCTCAGAACCGCCACGTTCCAG  
 Ei1r6e: CTTGGGTCGTAGACATCGACGACTACTGACGACTTGAGGTAGCACCATTACCATATCACCGG  
 Ei1r14e: CTTGGGTCGTAGACATCGACGACTACTGACATCGGCTGACCAAGTACCGCACTCTTAGTTGC  
 Ei1r16e: CTTGGGTCGTAGACATCGACGACTACTGACCATATTTATTTTCGAGCCAGTAATAAATCAATA  
 Ei1r24e: CTTGGGTCGTAGACATCGACGACTACTGACTTATAATGAACAAAGAAACCACCTTTTCAGG  
 Ei1r26e: CTTGGGTCGTAGACATCGACGACTACTGACCTAAAGCAAATCAATATCTGGTCACCCGAACG  
 Ei1r6f: CTTGGGTCGTAGACATCGACGACTACTGACAATCACCACCATTTGGGAATTAGACCAACCTA  
 Ei1r16f: CTTGGGTCGTAGACATCGACGACTACTGACAGAGGCATACAACGCCAACATGTATCTGCGAA  
 Ei1r26f: CTTGGGTCGTAGACATCGACGACTACTGACAAACCTCTCACCTTGCTGAACCTAGAGGATC  
 Ei-1r4e: CTTGGGTCGTAGACATCGACGACTACTGACCAATGACAGCTTGATACCGATAGTCTCCCTCA

Et-1r6e: CTTGGGTCGTAGACATCGACGACTACTGACAAACGAAATGCCACTACGAAGGCAGCCAGCAA  
 Et-1r14e: CTTGGGTCGTAGACATCGACGACTACTGACTTTTAATTGCCCGAAAGACTTCAACAAGAACG  
 Et-1r16e: CTTGGGTCGTAGACATCGACGACTACTGACCGAGTAGAACAGTTGATTCCCAATATTTAGGC  
 Et-1r24e: CTTGGGTCGTAGACATCGACGACTACTGACGCTTCTGGCACTCCAGCCAGCTTTACATTATC  
 Et-1r26e: CTTGGGTCGTAGACATCGACGACTACTGACCCCGGTACTGCAGGTCGACTCTCAAATATC  
 Et-1r6f: CTTGGGTCGTAGACATCGACGACTACTGACATACGTAAGAGGCAAAAAGAATACTGACCAA  
 Et-1r16f: CTTGGGTCGTAGACATCGACGACTACTGACTCCATATATTTAGTTTGACCATTAAGCATAAA  
 Et-1r26f: CTTGGGTCGTAGACATCGACGACTACTGACCTTGCATGCCGAGCTCGAATTCGTCCTGTCGT  
 Et-3r4e: CTTGGGTCGTAGACATCGACGACTACTGACATATATTCTCAGCTTGCTTTTCGAGTGGGATTT  
 Et-3r6e: CTTGGGTCGTAGACATCGACGACTACTGACCTCATCTTGGAAGTTTCCATTAAACATAACCG  
 Et-3r14e: CTTGGGTCGTAGACATCGACGACTACTGACGAAGCAAAAAAGCGGATTGCATCAATGTTTAG  
 Et-3r16e: CTTGGGTCGTAGACATCGACGACTACTGACTCGAAATAAGTACGGTGTCTGGACCAGACCG  
 Et-3r24e: CTTGGGTCGTAGACATCGACGACTACTGACTTCGCCATGGACGACGACAGTATCGTAGCCAG  
 Et-3r26e: CTTGGGTCGTAGACATCGACGACTACTGACTCATAGCTTGTA AAAACGACGGCCAAAGCGCCA  
 Et-3r6f: CTTGGGTCGTAGACATCGACGACTACTGACTTTCATGATGACCCCGAGCGATTAAGGCGCAG  
 Et-3r8f: CTTGGGTCGTAGACATCGACGACTACTGACACGGTCAATGACAAGAACCGGATATGGTTTAA  
 Et-3r10f: CTTGGGTCGTAGACATCGACGACTACTGACTTTCAACTACGGAAACAACATTATTAACACTAT  
 Et-3r12f: CTTGGGTCGTAGACATCGACGACTACTGACCATAACCCGCGTCCAATACTGCGGTATTATAG  
 Et-3r14f: CTTGGGTCGTAGACATCGACGACTACTGACTCAGAAGCCTCCAACAGGTCAGGATTTAAATA  
 Et-3r16f: CTTGGGTCGTAGACATCGACGACTACTGACTGCAACTAGGTCAATAACCTGTTTAGAATTAG  
 Et-3r18f: CTTGGGTCGTAGACATCGACGACTACTGACCAAAATAGGATAAAAATTTTTAGGATTTCA  
 Et-3r20f: CTTGGGTCGTAGACATCGACGACTACTGACACCGTCTGATGAACGGTAATCGTAATATTTT  
 Et-3r22f: CTTGGGTCGTAGACATCGACGACTACTGACGTTAAAATAACATTAATGTGAGCATCTGCCA  
 Et-3r24f: CTTGGGTCGTAGACATCGACGACTACTGACGTTTGGAGGTCAGGCTGCGCAACTGTTCCAGT  
 Et-3r26f: CTTGGGTCGTAGACATCGACGACTACTGACCACGACGTGTTTCTGTGTGAAATTTGCGCTC  
 Et-5r6e: CTTGGGTCGTAGACATCGACGACTACTGACGCGAAAACAAGAGGCTTTGAGGACTAGGGAGTT  
 Et-5r8e: CTTGGGTCGTAGACATCGACGACTACTGACCCAAATCATTACTTAGCCGGAACGTACCAAGC  
 Et-5r10e: CTTGGGTCGTAGACATCGACGACTACTGACAAAAGATTCTAAATTTGGGCTTGAGATTCATTAC  
 Et-5r12e: CTTGGGTCGTAGACATCGACGACTACTGACTAAATATTGAGGCATAGTAAGAGCACAGGTAG  
 Et-5r14e: CTTGGGTCGTAGACATCGACGACTACTGACTACCTTAAAGGTCTTTACCCTGACAATCGTCA  
 Et-5r16e: CTTGGGTCGTAGACATCGACGACTACTGACTTTCATTTCTGTAGCTCAACATGTTTAGAGAG  
 Et-5r18e: CTTGGGTCGTAGACATCGACGACTACTGACTATATTTTCATACAGGCAAGGCAAAAGCTATAT  
 Et-5r20e: CTTGGGTCGTAGACATCGACGACTACTGACCATGTCAAAAATCACCATCAATATAACCCTCA  
 Et-5r22e: CTTGGGTCGTAGACATCGACGACTACTGACACCCGTCGTTAAATTGTAAACGTTAAAAGTAG  
 Et-5r24e: CTTGGGTCGTAGACATCGACGACTACTGACGGCGATCGCGCATCGTAACCGTGCGAGTAACA  
 Et-5r26e: CTTGGGTCGTAGACATCGACGACTACTGACGCTCACAAGGGTAACGCCAGGGTTTTGGGAAG  
 Other sequences can be found in the sequences list for the tall rectangle origami<sup>4</sup>.

## Staple for assembly of the origami of $C$ , $u$ , $A$ , $g$ patterns

L-7r2i: CTGAAACAATAGGAACCCATGTACAGGGATAGCAAGCCCA  
 L-7r6e: TGCCTTTAGACAGCATCGGAACGAACCCCTCAG  
 L-7r10e: AAAAGTAACTTGCCCTGACGAGAACATTCAGT  
 L-7r14e: TATAGAAGCAGAAAACGAGAATGAAATGCTTT  
 L-7r18e: AATTACTAACTAATAGTAGTAGCAAGGTGGCA  
 L-7r22e: GAGCAAAACCCAAAAACAGGAAGATGATAATC  
 L-7r26e: AGATTAGAGAAAGGGGGATGTGCTTATTACGC  
 L-7r30e: GGAAATACGCAAGCGGTCCACGCTCCCTGAGA  
 L7r2f: AATAATAAGTCAGACGATTGGCCTCAGGAGGT  
 L7r6f: CGCCTGATAGACAAAAGGGCGACAGGTTTACC  
 L7r10f: CATTCAACAACGTCAAAAATGAAAAACGATT  
 L7r14f: TTTTTCGACGCGCTGTTTATCAGTTCAGCT  
 L7r18f: AGGTAAAG CATAGGTCTGAGAGACGTGAATTT  
 L7r22f: GATTGACCACTTCTGAATAATGGATGATTGTT  
 L7r26f: GCATAAAGCCAGCAGAAGATAAAAAATACCGA  
 L7r30j: ACCCAAATCAGGAACGGTACGCCATTAAGGGATTTTAGA  
 L-7r4e: TGAGGCAGTTTTTTCACGTTGAAAGAATTGCG  
 L-7r8e: AGCGCCAAAAATTGTGTGCAAACTGTATCAT



L-7r12e: TTTTGTTTTAATGCAGATACATAAGAATACCA  
L-7r16e: AATGCAGAGATGGCTTAGAGCTTAAGAGGTCA  
L-7r20e: ATCAAAATATTCAAAAGGGTGAGATAATGTGT  
L-7r24e: TGGATTATGTAATGGGATAGGTCAAAACGGCG  
L-7r28e: ACGAACCATGTAAAGCCTGGGGTGAGCCGGAA  
L7r4f: CAGCGAAAGCGTCAGACTGTAGCGATCAAGTT  
L7r8f: GAATAAGGGCAGATAGCCGAACAATTTTAAG  
L7r12f: AAACAGTTGCTTATCCGGTATTCTAAATCAGA  
L7r16f: TCAATTCTGAAAAAGCCTGTTTAGGGAATCAT  
L7r20f: AGAAAAGCGAAGATGATGAAACAAAATTACCT  
L7r24f: CAGCTGGCGCCGTCAATAGATAATCAACTAAT  
L7r28f: GAGTTGCACTACATTTTGACGCTCACGCTCAT

### Supplementary References:

1. Biesinger, M. C., Lau, L.W.M., Gerson, A. R. & Smart, R. St, C. Resolving surface chemical states in XPS analysis of first row transition metals, oxides and hydroxides: Sc, Ti, V, Cu and Zn. *Appl. Surf. Sci.* **257**, 887-898 (2010).
2. Ferraria, A. M., Carapeto, A. P. & Botelho do Rego, A. M. B. X-ray photoelectron spectroscopy: Silver salts revisited. *Vacuum* **86**, 1988-1991 (2012).
3. Liang, X., Mochizuki, T., & Asanuma, H. A supra-photoswitch involving sandwiched DNA base pairs and azobenzenes for light-driven nanostructures and nanodevices. *Small* **5**, 1761-1768 (2009).
4. Rothemund, P. W. K. Folding DNA to create nanoscale shapes and patterns. *Nature* **440**, 297-302 (2006).
